# Supplementary material for: The reactivity of antimony and bismuthN,C,N-pincer compounds toward K[BEt3H] – the formation of heterocyclic compoundsvs. element–element bondsvs.stable terminal Sb–H bonds
Source: Royal Society of Chemistry journal article supplement (doi:10.1039/d2dt03564b), 2022-11-30
Supplement: d2dt03564b1.pdf [file d2dt03564b1.pdf]

ESI for:

**The Reactivity of Antimony and Bismuth *N,C,N*-Pincer Compounds toward  $K[BEt_3H]$  – the Formation of Heterocyclic Compounds vs. Element-Element Bonds vs. Stable Terminal Sb-H Bonds.**

P. Novák, M. Erben, R. Jambor, M. Hejda, A. Růžička, E. Rychagova, S. Ketkov\* and L. Dostál\*

\*E-mails: libor.dostal@upce.cz (L.D.), sketkov@iomc.ras.ru (S.K.)

**Table of contents:**

|                                                    |                |
|----------------------------------------------------|----------------|
| 1) Synthesis and NMR spectra of starting compounds | <b>S2-S7</b>   |
| 2) NMR spectra of studied compounds                | <b>S8-S13</b>  |
| 3) NMR spectra of important reaction mixtures      | <b>S14-S20</b> |
| 4) Crystallographic data for studied compounds     | <b>S21-S22</b> |
| 5) IR and Raman spectra                            | <b>S23</b>     |
| 6) Theoretical study                               | <b>S24-S25</b> |

## 1) Synthesis and NMR spectra of starting compounds.

### Synthesis of 2-Sb

779 mg (1.36 mmol) of **1-Sb** was dissolved in benzene (15 mL) and 270  $\mu\text{L}$  (1.36 mmol) of neat  $\text{Me}_3\text{SiCH}_2\text{OTf}$  was added. The solution was stirred for 12 h at r.t. and the reaction mixture was evaporated. The solid residue was washed with hexane (*ca* 2x10 mL) and dried *in vacuo* giving **2-Sb** as a white powder. Yield 842 mg, 77%, m.p. 240-244  $^\circ\text{C}$ . Anal. Calcd for  $\text{C}_{37}\text{H}_{50}\text{F}_3\text{N}_2\text{O}_3\text{SSbSi}$  ( $M_r = 809.72$ ): C, 54.9 %; H, 6.2 %; N, 3.5 %. Found: C, 55.2 %; H 6.5 %; N, 3.8 %.  $^1\text{H}$  NMR (500 MHz,  $\text{CD}_3\text{CN}$ ):  $\delta$  -0.49 [9H, s,  $\text{Si}(\text{CH}_3)_3$ ]; 0.87 [2H, s,  $\text{SiCH}_2$ ]; 1.10 [6H, d,  $^3J_{\text{H,H}} = 6.7$  Hz, *iPr-CH*]; 1.21 [6H, d,  $^3J_{\text{H,H}} = 6.9$  Hz, *iPr-CH*]; 1.26 [6H, d,  $^3J_{\text{H,H}} = 6.7$  Hz, *iPr-CH*]; 1.29 [6H, d,  $^3J_{\text{H,H}} = 6.9$  Hz, *iPr-CH*]; 2.69 [2H, h,  $^3J_{\text{H,H}} = 6.9$  Hz, *iPr-CH*]; 3.09 [2H, h,  $^3J_{\text{H,H}} = 6.7$  Hz, *iPr-CH*]; 7.32-7.38 [6H, m, Ar-H]; 8.08 [1H, t,  $^3J_{\text{H,H}} = 7.7$  Hz, Ar-H]; 8.47 [2H, d,  $^3J_{\text{H,H}} = 7.7$  Hz, Ar-H]; 9.16 [2H, s,  $\text{CH}=\text{N}$ ] ppm.  $^{13}\text{C}\{^1\text{H}\}$  NMR (125.76 MHz,  $\text{CD}_3\text{CN}$ ):  $\delta$  -0.7 [ $\text{Si}(\text{CH}_3)_3$ ]; 7.9 [ $\text{SiCH}_2$ ]; 23.7 [*iPr-CH*]; 23.9 [*iPr-CH*]; 25.1 [*iPr-CH*]; 26.8 [*iPr-CH*]; 29.1 [*iPr-CH*]; 30.0 [*iPr-CH*]; not detected [ $\text{CF}_3$ ], 125.6 [Ar-C]; 125.9 [Ar-C]; 129.5 [Ar-C]; 133.3 [Ar-C]; 137.5 [Ar-C]; 140.3 [Ar-C]; 141.2 [Ar-C]; 141.4 [Ar-C]; 142.0 4 [Ar-C]; 156.3 [C-*ipso*]; 171.1 [ $\text{CH}=\text{N}$ ] ppm.

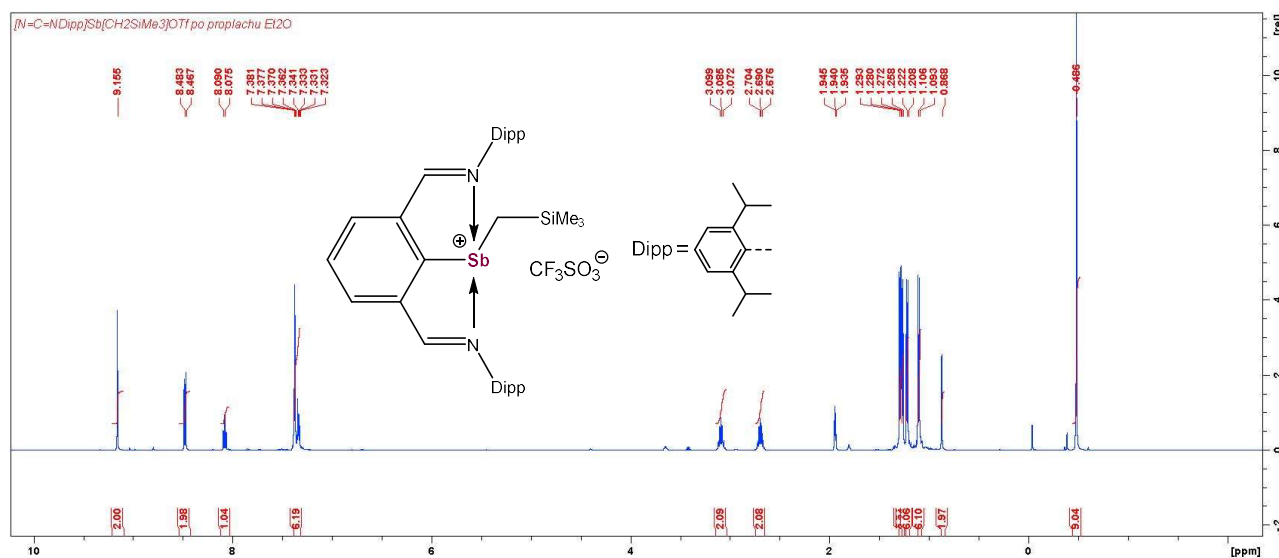

Figure S1:  $^1\text{H}$  NMR spectrum of **2-Sb** in  $\text{CD}_3\text{CN}$  (500 MHz).

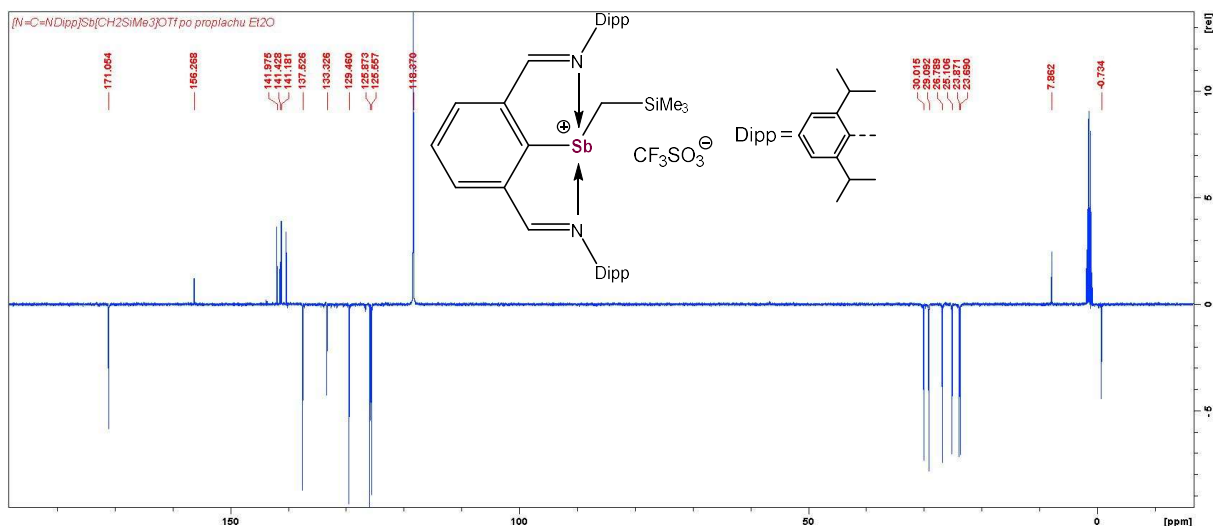

**Figure S2:**  $^{13}\text{C}\{^1\text{H}\}$ -APT NMR spectrum of **2-Sb** in  $\text{CD}_3\text{CN}$  (125.6 MHz).

### Synthesis of **2-Bi**

826 mg (1.25 mmol) of **1-Bi** was dissolved in benzene (15 mL) and 250  $\mu\text{L}$  (1.25 mmol) of neat  $\text{Me}_3\text{SiCH}_2\text{OTf}$  was added. The solution was stirred for 12 h at r.t. and the reaction mixture was evaporated. The solid residue was washed with hexane (*ca* 2x10 mL) and dried *in vacuo* giving **2-Bi** as a white powder. The product can re-crystallized from dichloromethane/hexane mixture. Yield 800 mg, 71%, m.p. 190-192  $^\circ\text{C}$ . Anal. Calcd for  $\text{C}_{37}\text{H}_{50}\text{BiF}_3\text{N}_2\text{O}_3\text{SSi}$  ( $M_r = 896.94$ ): C, 49.6 %; H, 5.6 %; N, 3.1 %. Found: C, 49.5 %; H 5.7 %; N, 3.3 %.  $^1\text{H}$  NMR (500 MHz,  $\text{CD}_3\text{CN}$ ):  $\delta$  -0.37 [9H, s,  $\text{Si}(\text{CH}_3)_3$ ]; 1.11 [6H, d,  $^3J_{\text{H,H}} = 6.7$  Hz, *iPr-CH*<sub>3</sub>]; 1.19 [6H, d,  $^3J_{\text{H,H}} = 6.7$  Hz, *iPr-CH*<sub>3</sub>]; 1.24 [2H, s,  $\text{SiCH}_2$ ]; 1.27 [12H, m, *iPr-CH*<sub>3</sub>]; 2.72 [2H, h,  $^3J_{\text{H,H}} = 6.8$  Hz, *iPr-CH*]; 3.01 [2H, h,  $^3J_{\text{H,H}} = 6.7$  Hz, *iPr-CH*]; 7.31-7.36 [6H, m, Ar-*H*]; 8.13 [1H, t,  $^3J_{\text{H,H}} = 7.7$  Hz, Ar-*H*]; 8.57 [2H, d,  $^3J_{\text{H,H}} = 7.7$  Hz, Ar-*H*]; 9.68 [2H, s,  $\text{CH}=\text{N}$ ] ppm.  $^{13}\text{C}\{^1\text{H}\}$  NMR (125.76 MHz,  $\text{CD}_3\text{CN}$ ):  $\delta$  0.6 [ $\text{Si}(\text{CH}_3)_3$ ]; 23.3 [*iPr-CH*<sub>3</sub>]; 24.3 [*iPr-CH*<sub>3</sub>]; 24.9 [*iPr-CH*<sub>3</sub>]; 26.6 [*iPr-CH*<sub>3</sub>]; 29.0 [*iPr-CH*]; 30.1 [*iPr-CH*]; 34.2 [ $\text{SiCH}_2$ ]; 122.2 [t,  $^1J_{\text{F,C}} = 325$  Hz,  $\text{CF}_3$ ], 125.2 [Ar-C]; 125.8 [Ar-C]; 129.0 [Ar-C]; 131.9 [Ar-C]; 139.6 [Ar-C]; 140.3 [Ar-C]; 141.6 [Ar-C]; 143.5 [Ar-C]; 147.4 [Ar-C]; 176.0 [ $\text{CH}=\text{N}$ ]; 192.0 [C-*ipso*] ppm.

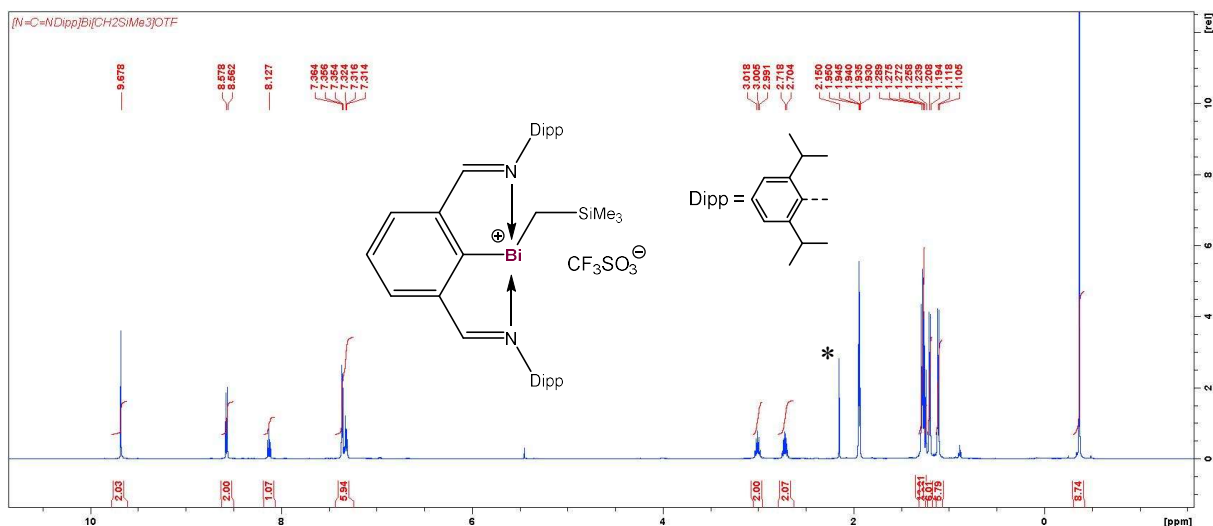

**Figure S3:**  $^1\text{H}$  NMR spectrum of **2-Bi** in  $\text{CD}_3\text{CN}$  (500 MHz). \*denotes traces of moisture in  $\text{CD}_3\text{CN}$ .

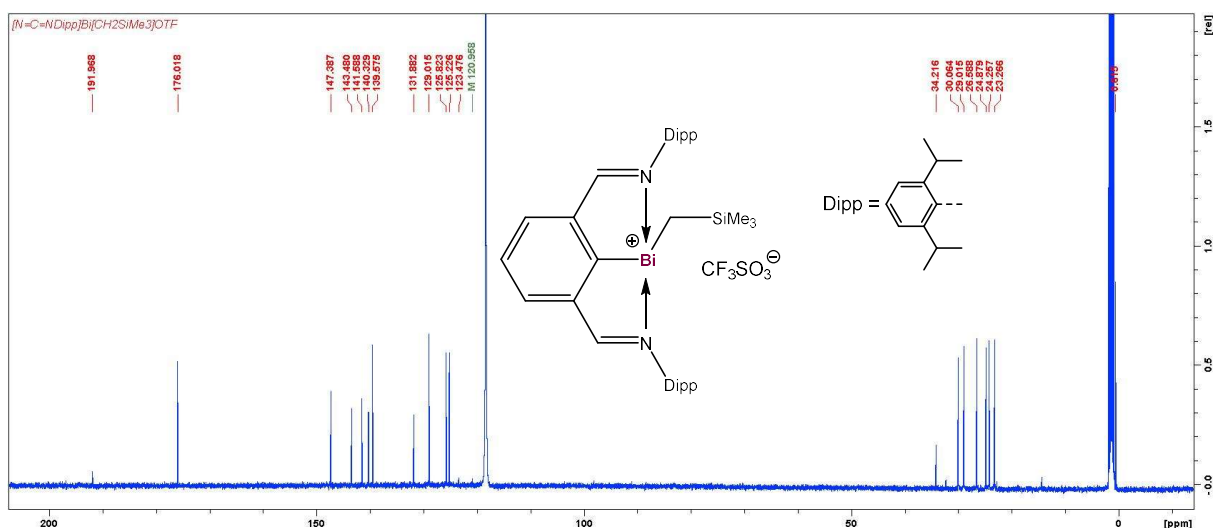

**Figure S4:**  $^{13}\text{C}\{^1\text{H}\}$  NMR spectrum of **2-Bi** in  $\text{CD}_3\text{CN}$  (125.6 MHz).

### Synthesis of 4-Sb

1.002 g (2.61 mmol) of **3-Sb** was dissolved in thf (40 mL), cooled to  $-25\text{ }^\circ\text{C}$  and 5.22 mL (5.22 mmol) of 1M solution of  $\text{K}[\text{BET}_3\text{H}]$  in thf as added dropwise. The yellow solution was stirred for 10 min at  $-25\text{ }^\circ\text{C}$  and for additional 30 min at r.t. Subsequently, 0.52 mL (2.61 mmol) of neat  $\text{Me}_3\text{SiCH}_2\text{OTf}$  was added. The solution was stirred for 1 h at r.t. and the reaction mixture was evaporated. The solid residue was washed with hexane (*ca* 2x10 mL) and dried *in vacuo*. Thus, obtained solid was extracted with acetonitrile (50 mL) and the clear colorless extract was

evaporated to give **4-Sb** as a white powder. The product can re-crystallized from thf/hexane mixture. Yield 592 mg, 42%, m.p. 132-137 °C. Anal. Calcd for  $C_{17}H_{30}F_3N_2O_3SSbSi$  ( $M_r = 549.34$ ): C, 37.2 %; H, 5.5 %; N, 5.1 %. Found: C, 37.6 %; H 5.7 %; N, 5.3 %.  $^1H$  NMR (400 MHz,  $CD_3CN$ ):  $\delta$  0.22 [9H, s,  $Si(CH_3)_3$ ]; 0.87 [2H, s,  $SiCH_2$ ]; 2.57 [6H, s,  $N(CH_3)_2$ ]; 2.64 [6H, s,  $N(CH_3)_2$ ]; 3.91 and 3.99 [4H, AB pattern,  $^2J_{H,H} = 15.1$  Hz,  $NCH_2$ ]; 7.27 [2H, d,  $^3J_{H,H} = 7.5$  Hz, Ar- $H$ ]; 7.44 [1H, t,  $^3J_{H,H} = 7.5$  Hz, Ar- $H$ ] ppm.  $^{13}C\{^1H\}$  NMR (100.6 MHz,  $CD_3CN$ ):  $\delta$  1.1 [Si( $CH_3$ ) $_3$ ]; 8.6 [Si $CH_2$ ]; 47.2 [N( $CH_3$ ) $_2$ ]; 48.2 [N( $CH_3$ ) $_2$ ]; 65.4 [N $CH_2$ ]; 122.1 [t,  $^1J_{F,C} = 322$  Hz,  $CF_3$ ], 126.6 [Ar-C]; 131.9 [Ar-C]; 142.9 [C-ipso]; 144.6 [Ar-C] ppm.

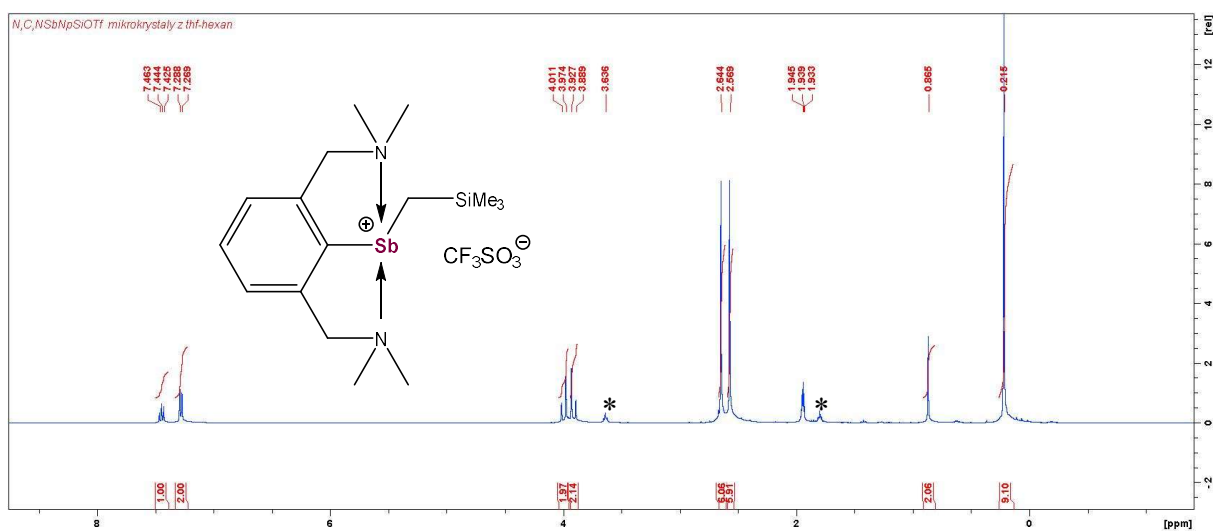

**Figure S5:**  $^1H$  NMR spectrum of **4-Sb** in  $CD_3CN$  (400 MHz). \*denotes traces of thf.

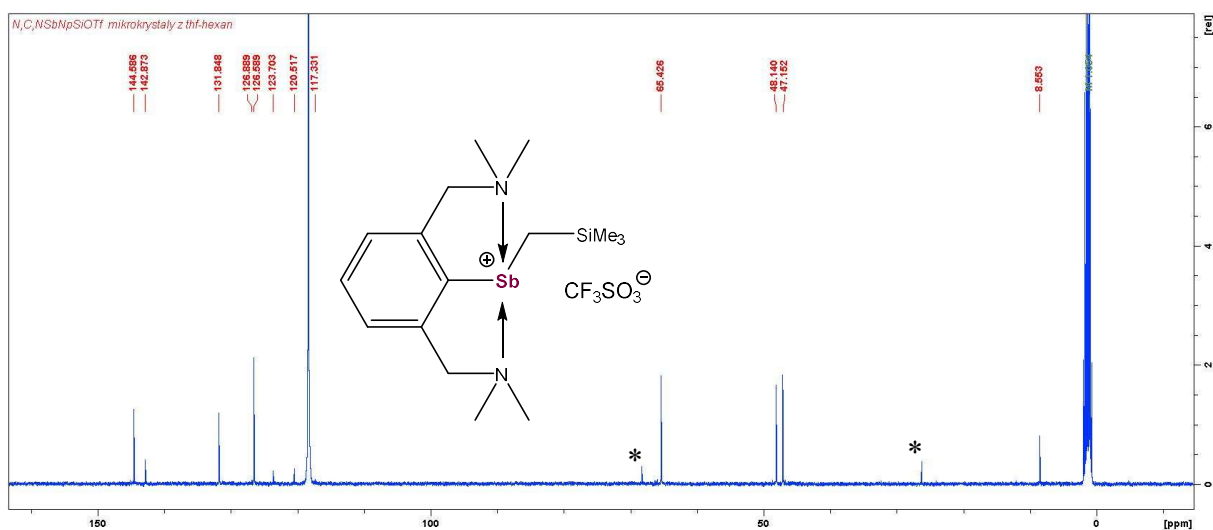

**Figure S6:**  $^{13}\text{C}\{^1\text{H}\}$  NMR spectrum of **4-Sb** in  $\text{CD}_3\text{CN}$  (125.6 MHz). \*denotes traces of thf.

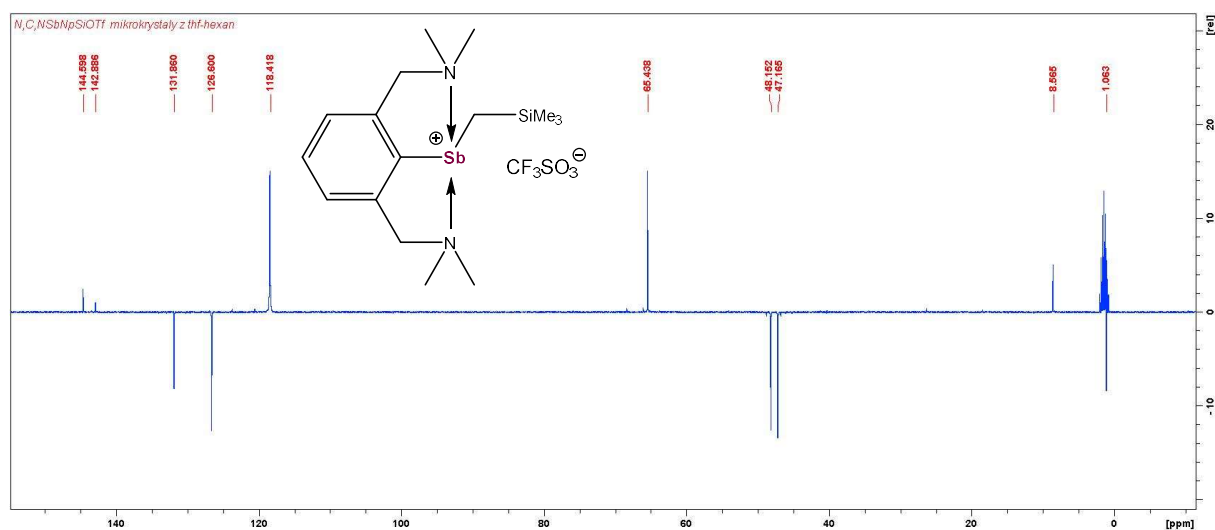

**Figure S7:**  $^{13}\text{C}\{^1\text{H}\}$ -APT NMR spectrum of **4-Sb** in  $\text{CD}_3\text{CN}$  (125.6 MHz).

### Synthesis of **5-Sb**

2.189 g (5.7 mmol) of **3-Sb** was mixed with thf (60 mL), cooled to  $-25\text{ }^\circ\text{C}$  and 11.4 mL (11.4 mmol) of 1M solution of  $\text{K}[\text{BET}_3\text{H}]$  in thf as added dropwise. The orange solution was stirred for 10 min at  $-25\text{ }^\circ\text{C}$  and for additional 30 min at r.t. Subsequently, 0.36 mL (5.7 mmol) of neat MeI was added. The solution was stirred for 1 h at r.t. and the reaction mixture was evaporated. The solid residue was washed with hexane (*ca* 2x10 mL) and dried *in vacuo*. Thus, obtained solid was extracted with acetonitrile (30 mL) and the clear colorless extract was evaporated and washed with hexane (10 mL) give **5-Sb** as a white powder. Yield 1.532 g, 59%, m.p. 227-230  $^\circ\text{C}$ . Anal. Calcd for  $\text{C}_{13}\text{H}_{22}\text{IN}_2\text{Sb}$  ( $M_r = 455.00$ ): C, 34.3 %; H, 4.9 %; N, 6.2 %. Found: C, 34.8 %; H 5.2 %; N, 6.3 %.  $^1\text{H}$  NMR (500 MHz,  $\text{CD}_3\text{CN}$ ):  $\delta$  1.25 [3H, s,  $\text{CH}_3$ ]; 2.57 [6H, s,  $\text{N}(\text{CH}_3)_2$ ]; 2.69 [6H, s,  $\text{N}(\text{CH}_3)_2$ ]; 3.94 and 3.99 [4H, AB pattern,  $^2J_{\text{H,H}} = 14.9\text{ Hz}$ ,  $\text{NCH}_2$ ]; 7.28 [2H, d,  $^3J_{\text{H,H}} = 7.5\text{ Hz}$ ,  $\text{Ar-H}$ ]; 7.43 [1H, t,  $^3J_{\text{H,H}} = 7.5\text{ Hz}$ ,  $\text{Ar-H}$ ] ppm.  $^{13}\text{C}\{^1\text{H}\}$  NMR (100.6 MHz,  $\text{CD}_3\text{CN}$ ):  $\delta$  6.7 [ $\text{CH}_3$ ]; 46.7 [ $\text{N}(\text{CH}_3)_2$ ]; 48.1 [ $\text{N}(\text{CH}_3)_2$ ]; 65.8 [ $\text{NCH}_2$ ]; 126.3 [ $\text{Ar-C}$ ]; 131.5 [ $\text{Ar-C}$ ]; 143.2 [ $\text{C-ipso}$ ]; 144.5 [ $\text{Ar-C}$ ] ppm.

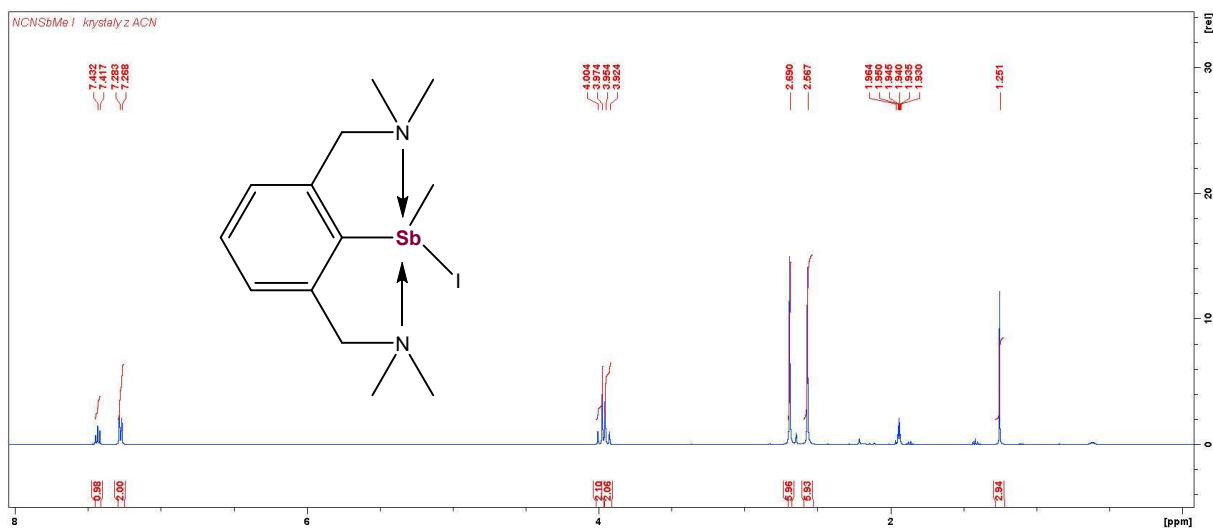

Figure S8:  $^1\text{H}$  NMR spectrum of **5-Sb** in  $\text{CD}_3\text{CN}$  (500 MHz).

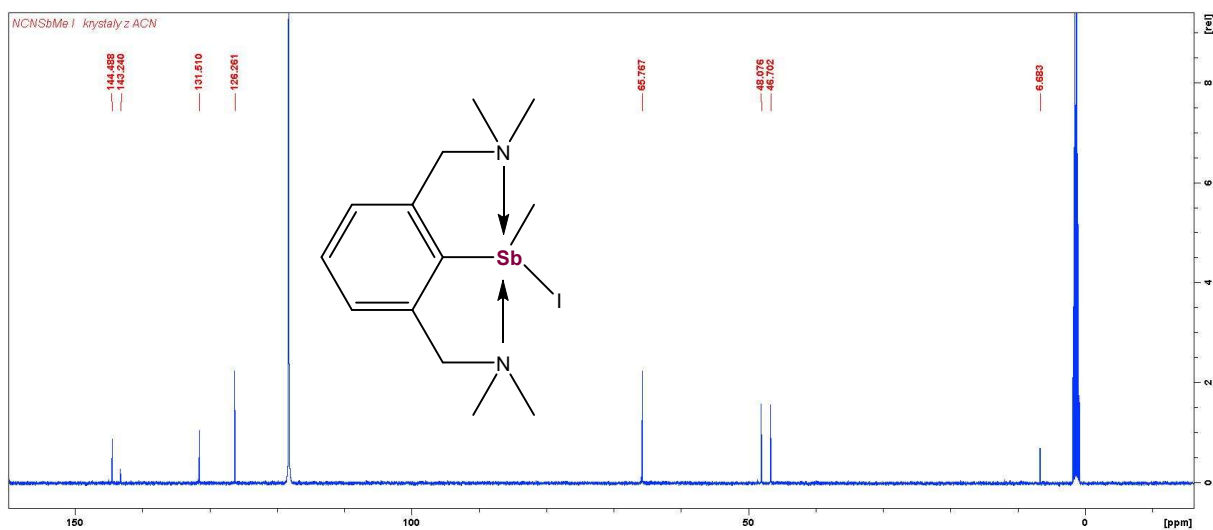

Figure S9:  $^{13}\text{C}\{^1\text{H}\}$  NMR spectrum of **5-Sb** in  $\text{CD}_3\text{CN}$  (125.6 MHz).

## 2) NMR spectra of studied compounds.

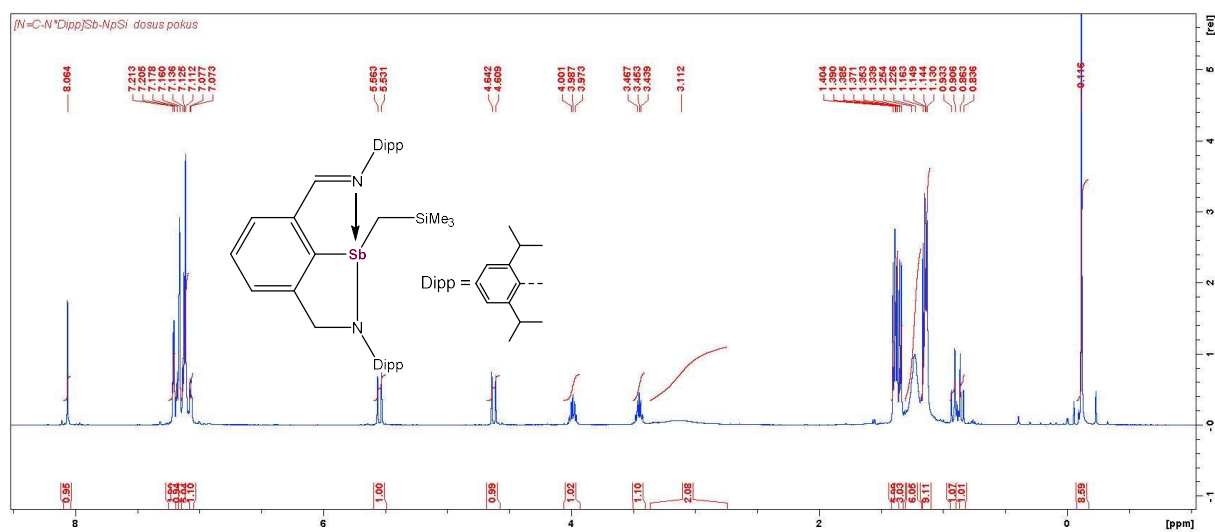

**Figure S10:  $^1\text{H}$  NMR spectrum of 6-Sb in  $\text{C}_6\text{D}_6$  (500 MHz).**

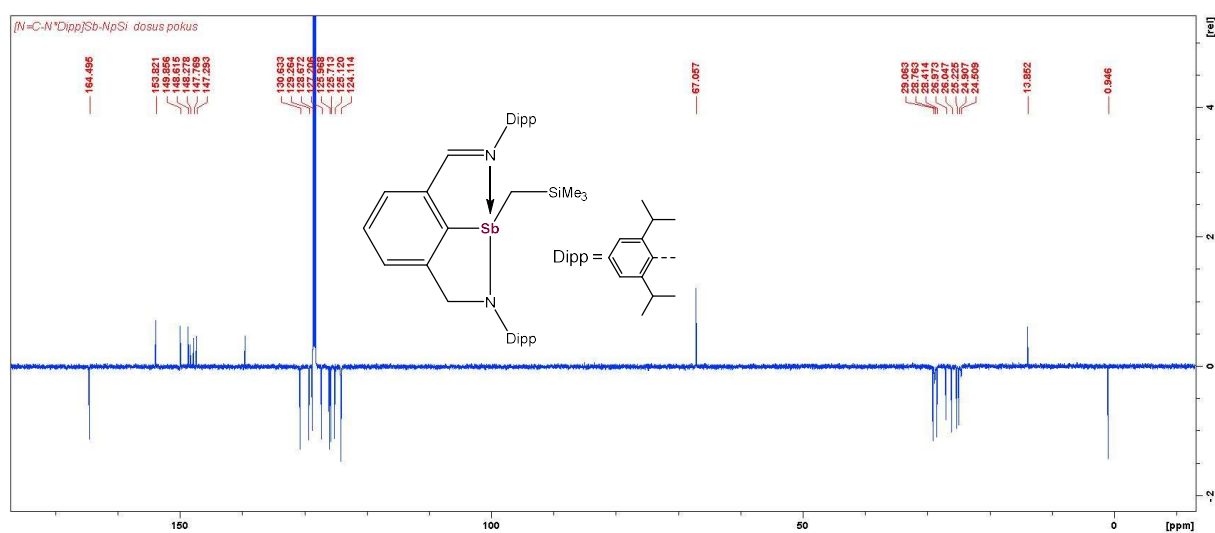

**Figure S11:  $^{13}\text{C}\{^1\text{H}\}$ -APT NMR spectrum of 6-Sb in  $\text{C}_6\text{D}_6$  (125.6 MHz).**



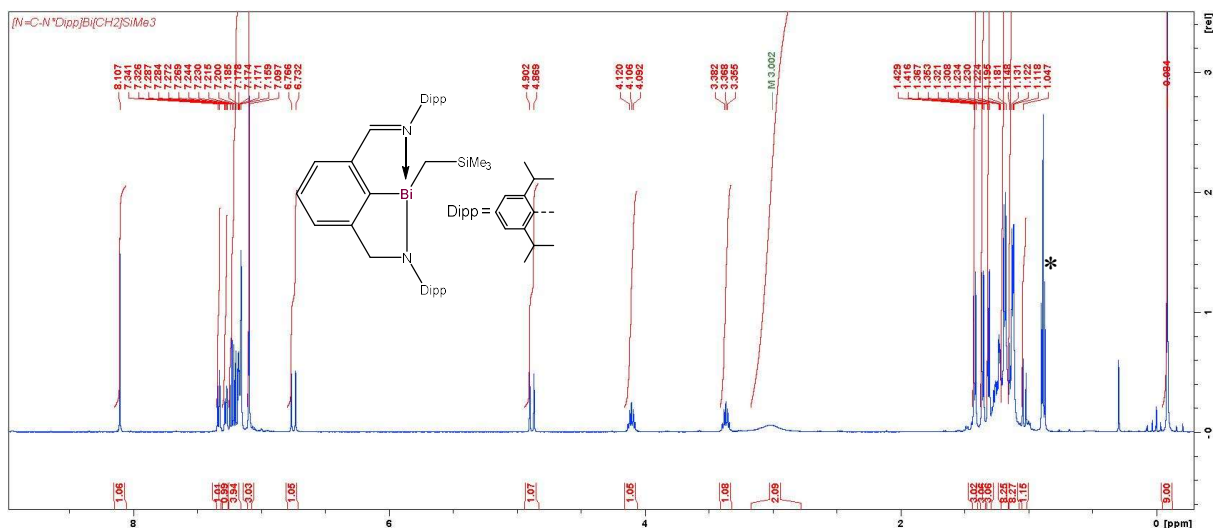

**Figure S12:**  $^1\text{H}$  NMR spectrum of **6-Bi** in  $\text{C}_6\text{D}_6$  (500 MHz). \*denotes traces of hexane present in dissolved single-crystals.

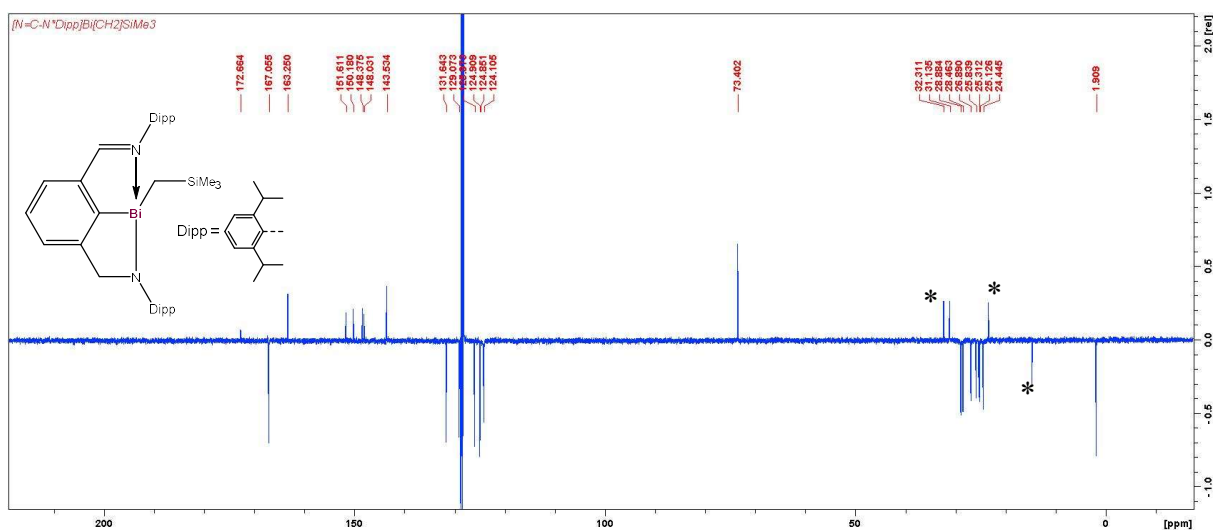

**Figure S13:**  $^{13}\text{C}\{^1\text{H}\}$ -APT NMR spectrum of **6-Bi** in  $\text{C}_6\text{D}_6$  (125.6 MHz). \*denotes traces of hexane present in dissolved single-crystals.

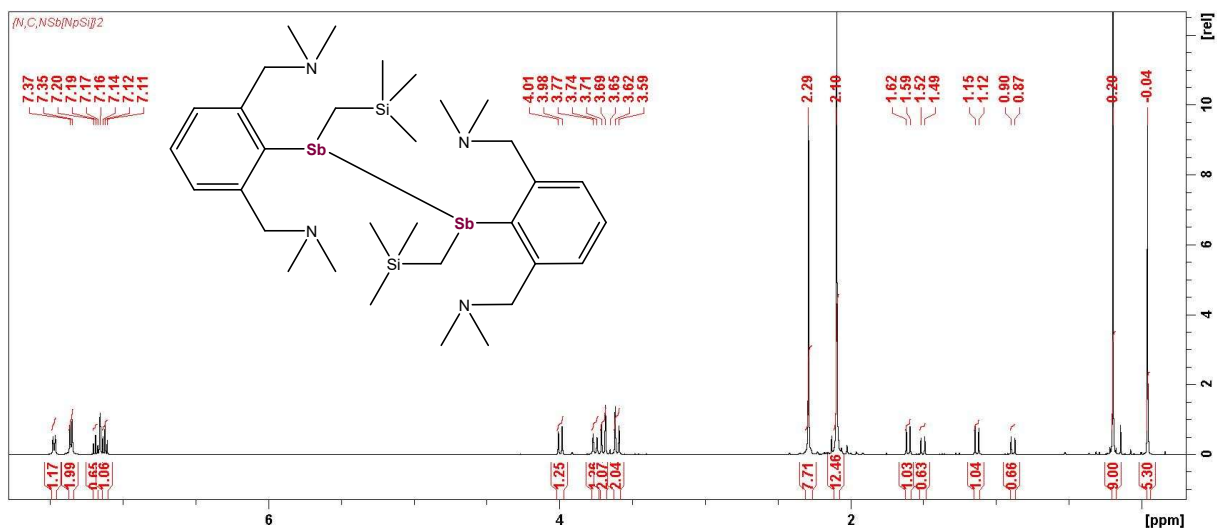

**Figure S14:**  $^1\text{H}$  NMR spectrum of *meso*-7-Sb and *rac*-RR/SS-7-Sb in  $\text{C}_6\text{D}_6$  (500 MHz).

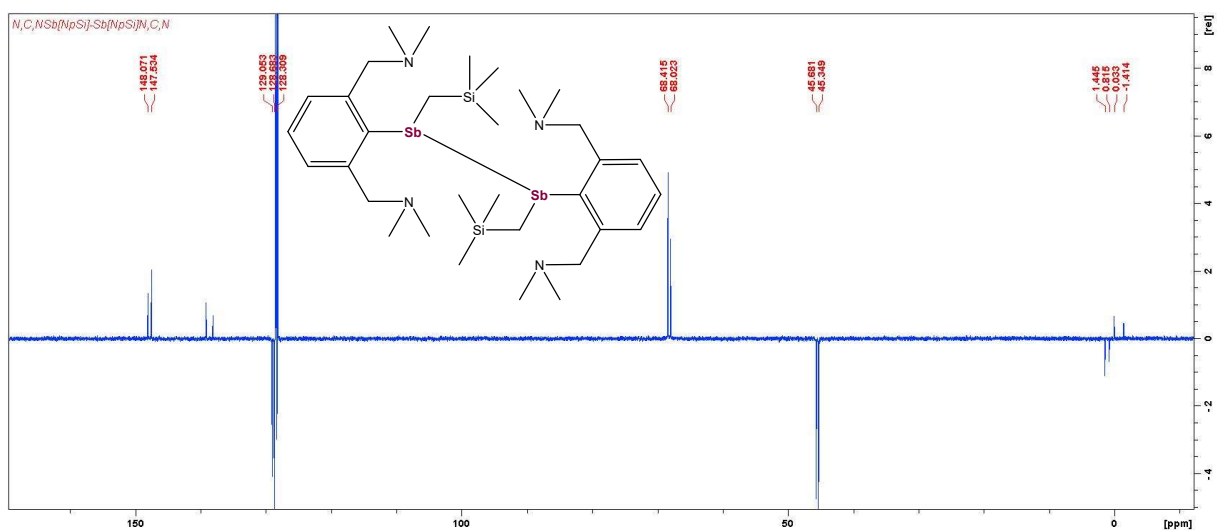

**Figure S15:**  $^{13}\text{C}\{^1\text{H}\}$ -APT NMR spectrum of *meso*-7-Sb and *rac*-RR/SS-7-Sb in  $\text{C}_6\text{D}_6$  (125.6 MHz).

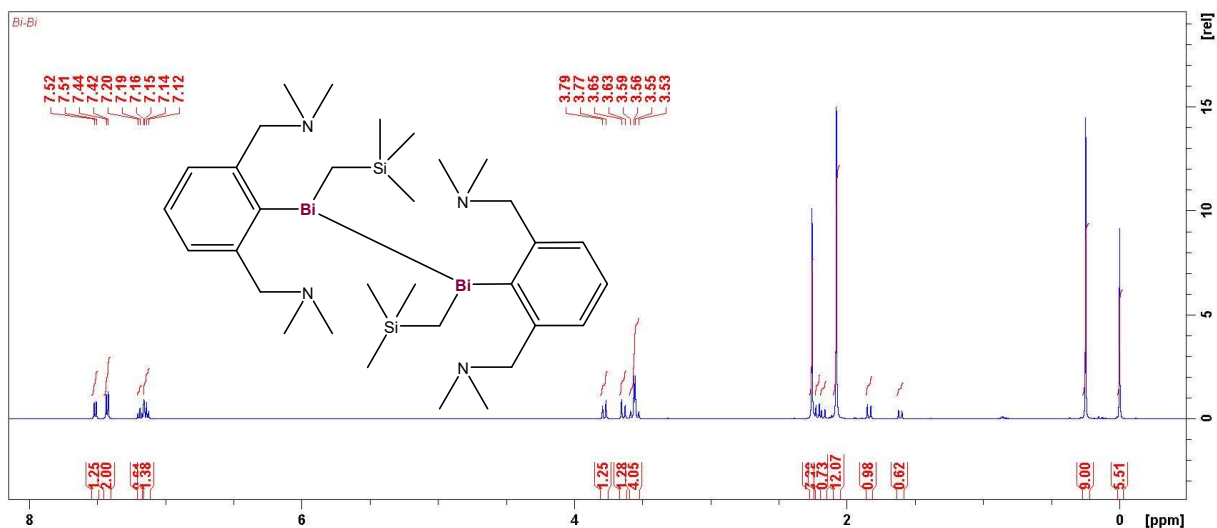

**Figure S16:** <sup>1</sup>H NMR spectrum of *meso*-7-Bi and *rac*-RR/SS-7-Bi in C<sub>6</sub>D<sub>6</sub> (400 MHz).

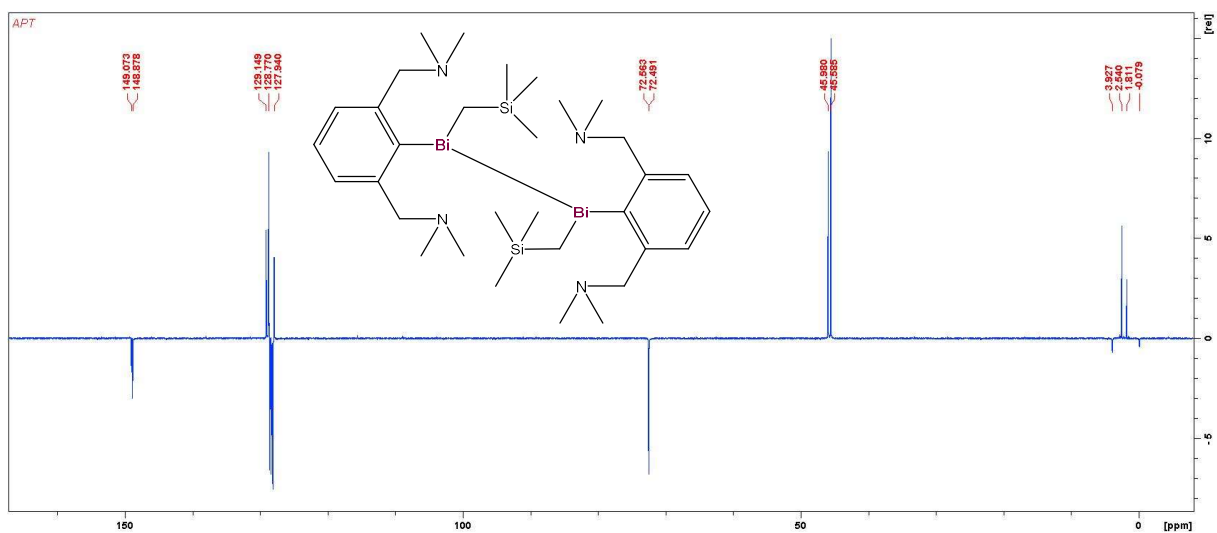

**Figure S17:** <sup>13</sup>C{<sup>1</sup>H}-APT NMR spectrum of *meso*-7-Bi and *rac*-RR/SS-7-Bi in C<sub>6</sub>D<sub>6</sub> (100.2 MHz).

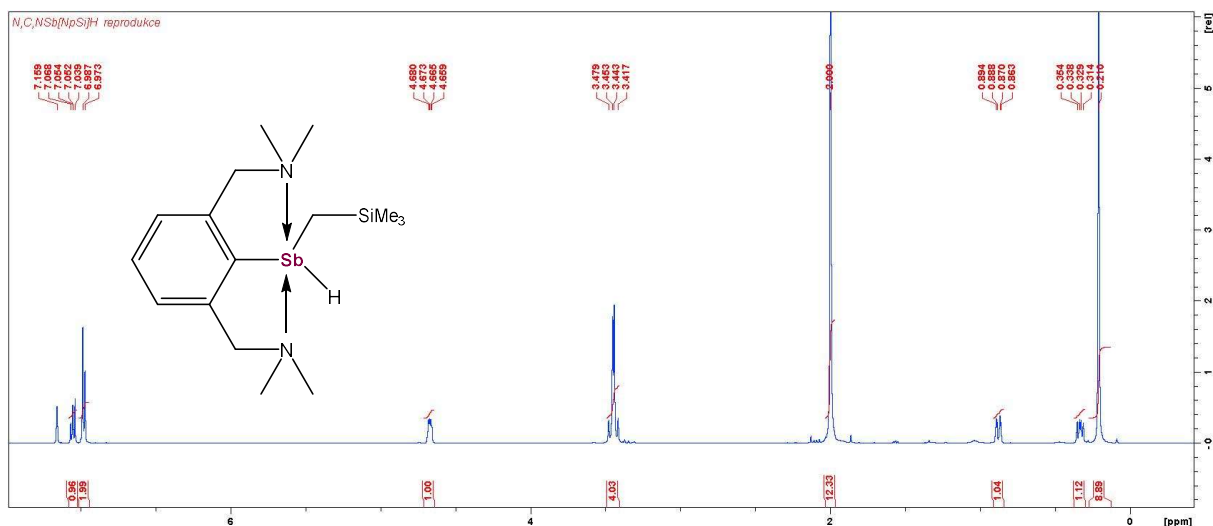

**Figure S18:**  $^1H$  NMR spectrum of **9-Sb** in  $C_6D_6$  (500 MHz).

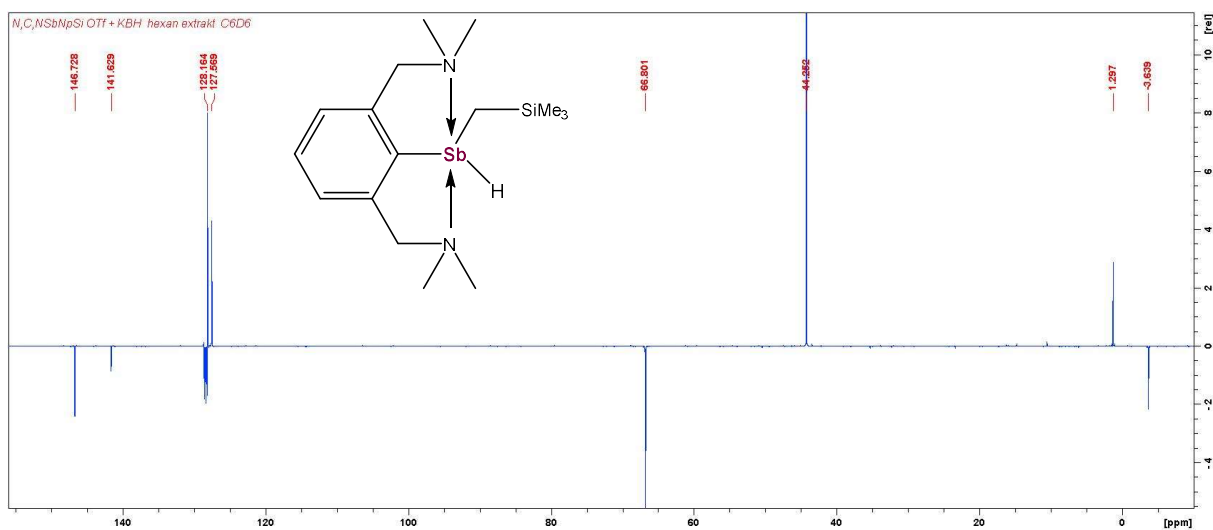

**Figure S19:**  $^{13}C\{^1H\}$ -APT NMR spectrum of **9-Sb** in  $C_6D_6$  (125.6 MHz).

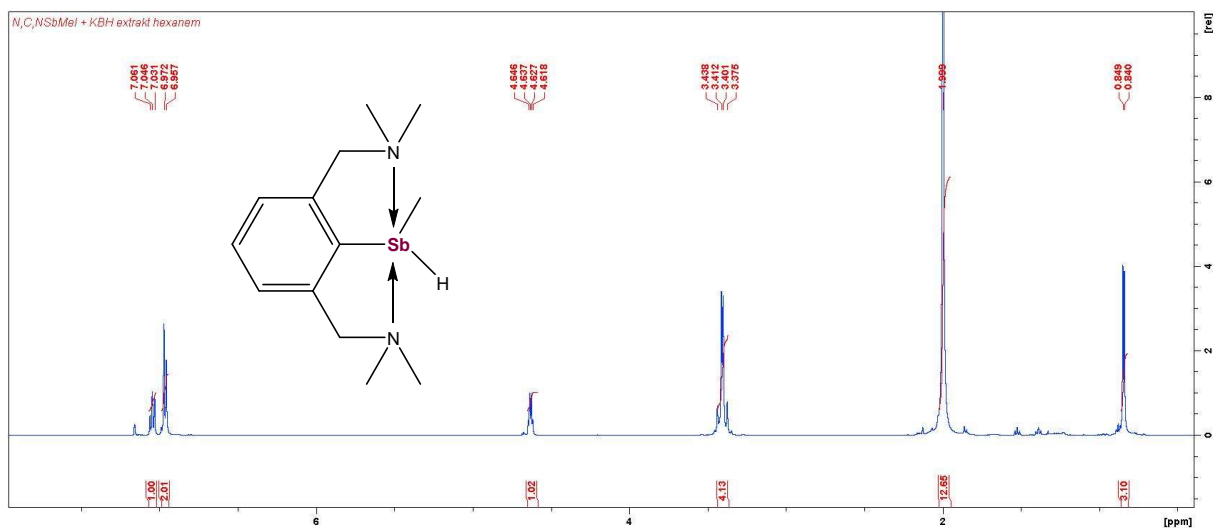

**Figure S20:**  $^1\text{H}$  NMR spectrum of **10-Sb** in  $\text{C}_6\text{D}_6$  (500 MHz).

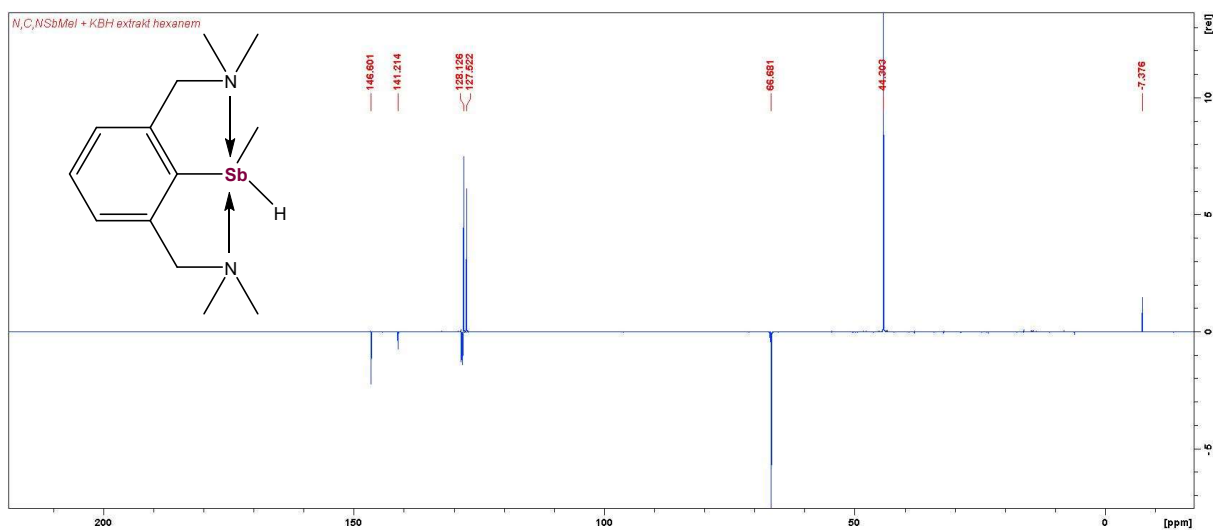

**Figure S21:**  $^{13}\text{C}\{^1\text{H}\}$ -APT NMR spectrum of **10-Sb** in  $\text{C}_6\text{D}_6$  (125.6 MHz).

### 3) NMR spectra of important reaction mixtures.

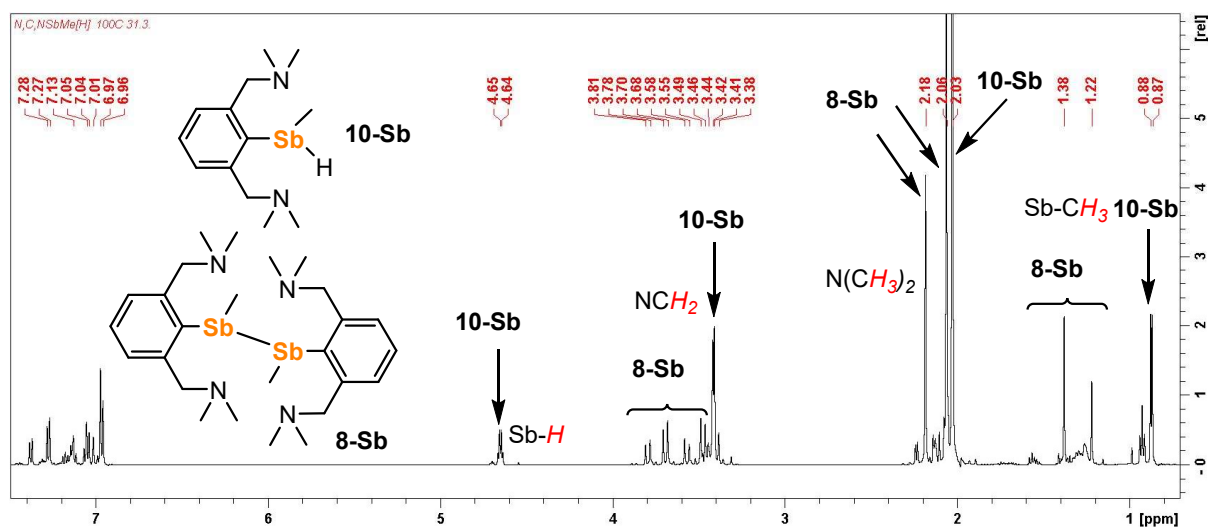

**Figure S22:**  $^1\text{H}$  NMR spectra showing mixture after heating of **10-Sb** neat (90 °C, 5 days) resulting in partial formation of mixture *meso*-**8-Sb** and *rac*-*RR/SS*-**8-Sb** along with the starting material.

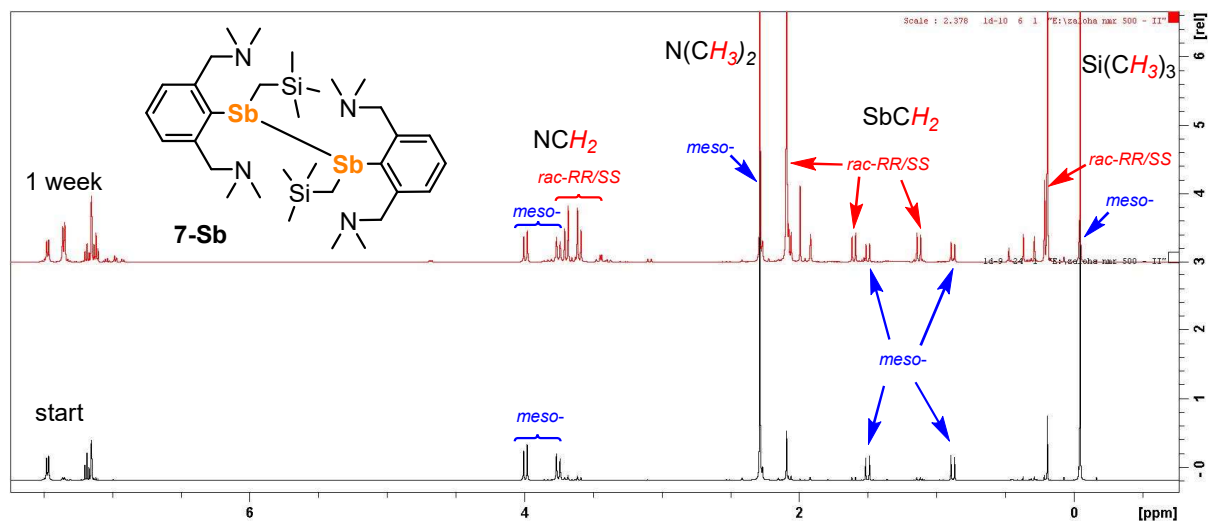

**Figure S23:**  $^1\text{H}$  NMR spectra of *meso*-**7-Sb** (bottom) and formation of its mixture with *rac*-*RR/SS*-**7-Sb** (0.6:1, top). Bulk sample after crystallization dissolved and sealed in  $\text{C}_6\text{D}_6$  (500 MHz).

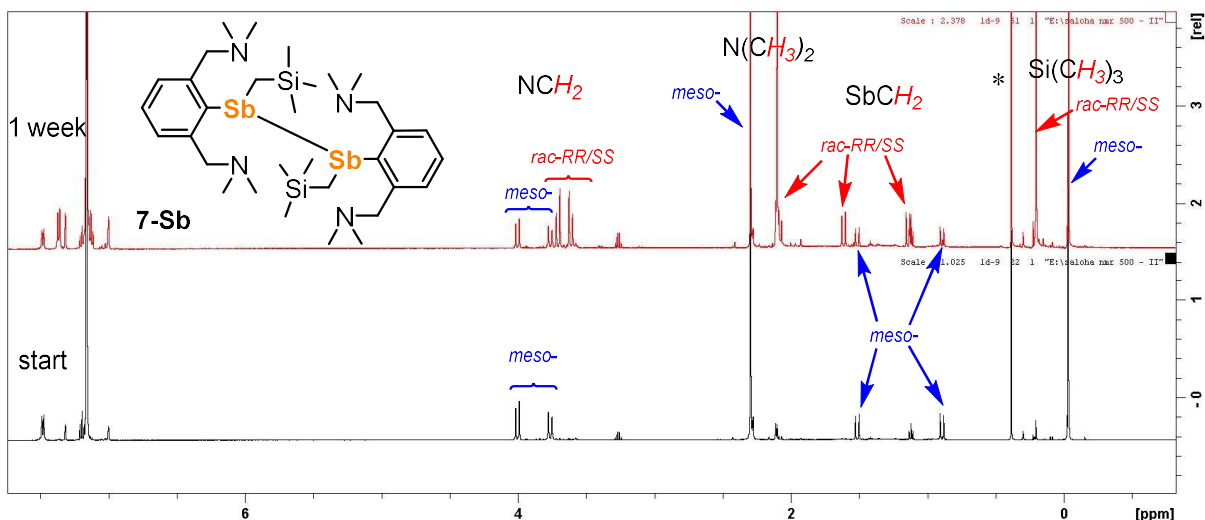

**Figure S24:** <sup>1</sup>H NMR spectra of *meso*-7-Sb (bottom) and formation of its mixture with *rac*-RR/SS-7-Sb (0.6:1, top). One single-crystal dissolved and sealed in C<sub>6</sub>D<sub>6</sub> (ns = 50, 500 MHz). \*denotes a trace amount of moisture visible due to the extremely low concentration of the sample.

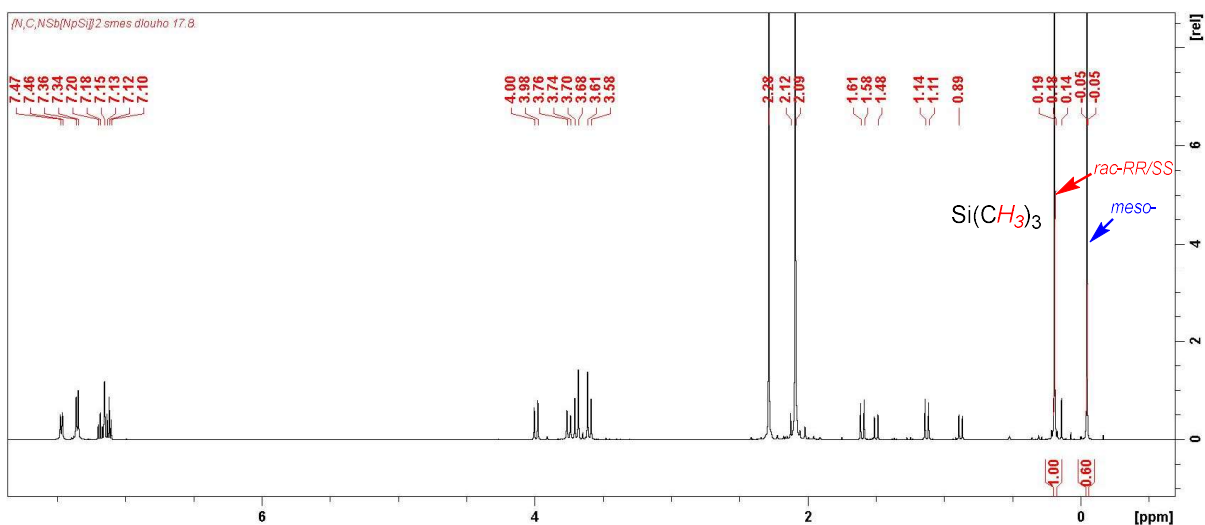

**Figure S25:** <sup>1</sup>H NMR spectra showing mixture of a bulk sample *meso*-7-Sb and *rac*-RR/SS-7-Sb (0.6:1) after two months sealed in C<sub>6</sub>D<sub>6</sub> (500 MHz).

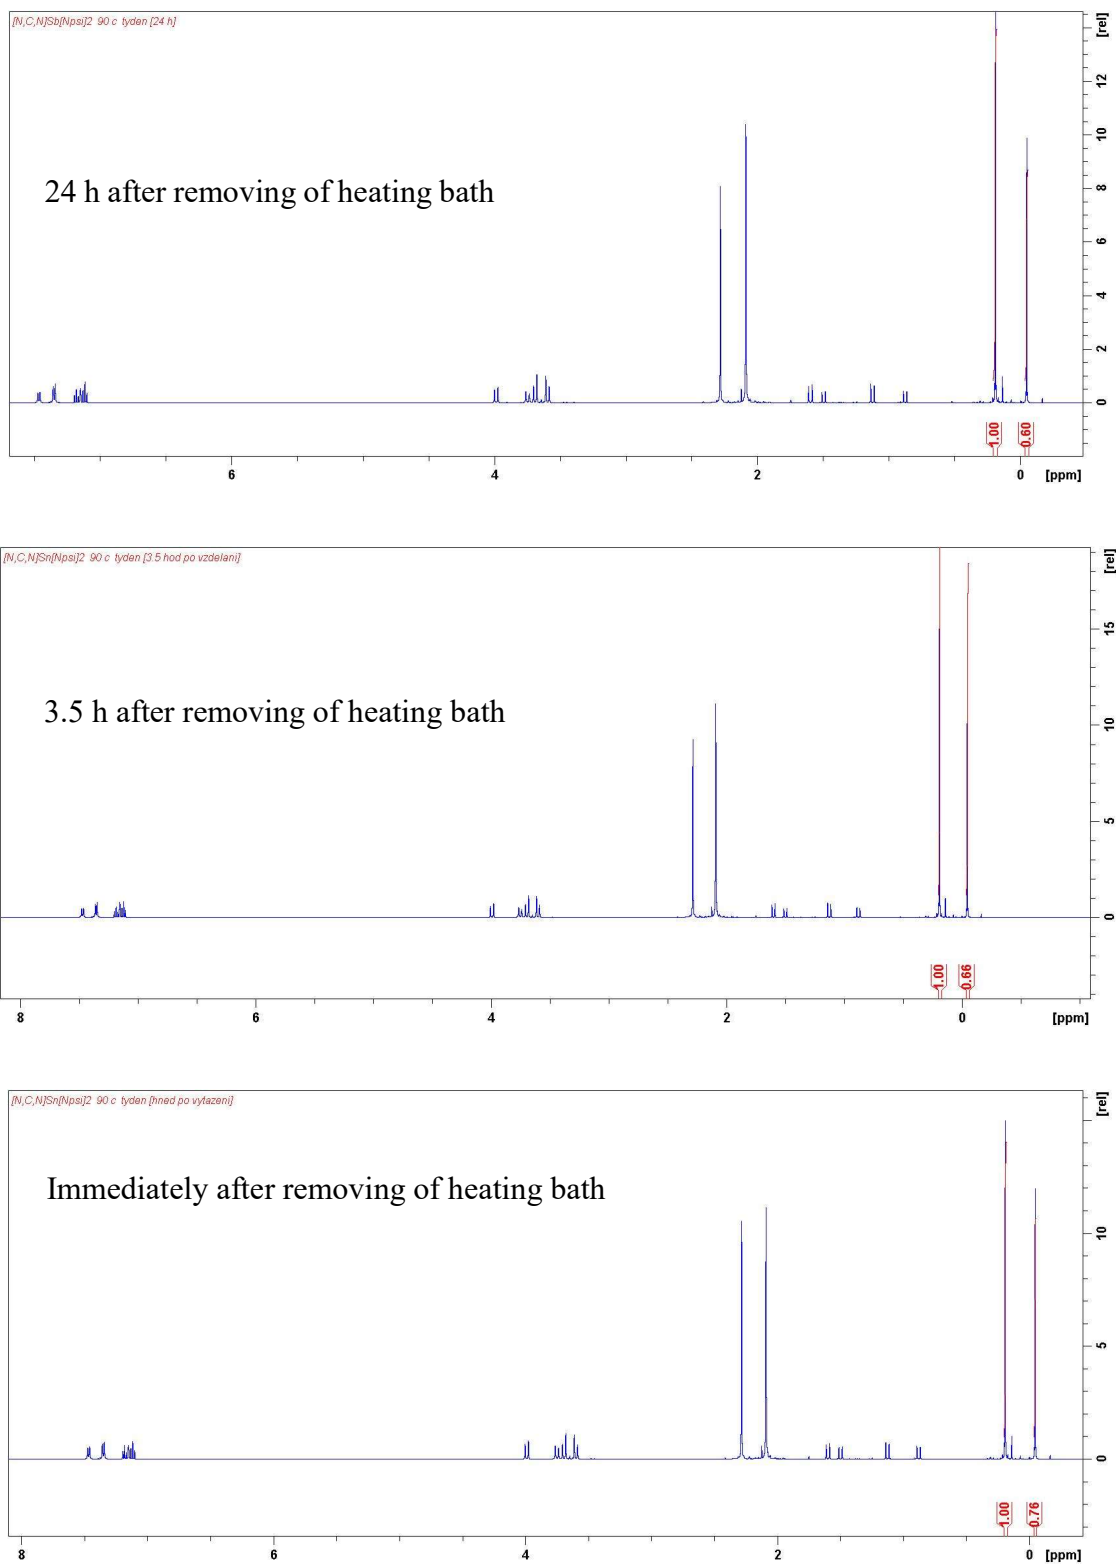

**Figure S26:**  $^1\text{H}$  NMR spectra showing mixture of a bulk sample *meso*-7-Sb and *rac*-RR/SS-7-Sb after 1 week of heating (90 °C) sealed in  $\text{C}_6\text{D}_6$  (ratio 0.76:1, bottom) and then leaving the sample at r.t. to recover the original mutual ratio of 0.6:1 (3.5 and 24h, top spectra) (500 MHz).



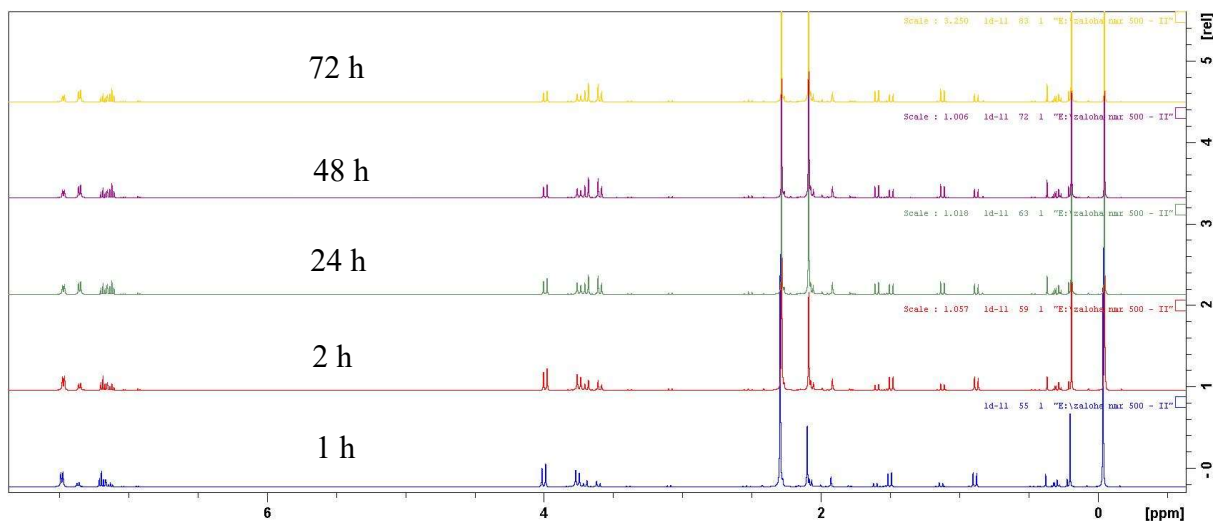

**Figure S27:**  $^1\text{H}$  NMR spectra showing gradual conversion of *meso*-**7-Sb** to its mixture with *rac*-RR/SS-**7-Sb** at r.t. in  $\text{C}_6\text{D}_6$  (the final ratio again 0.6:1, 500 MHz).

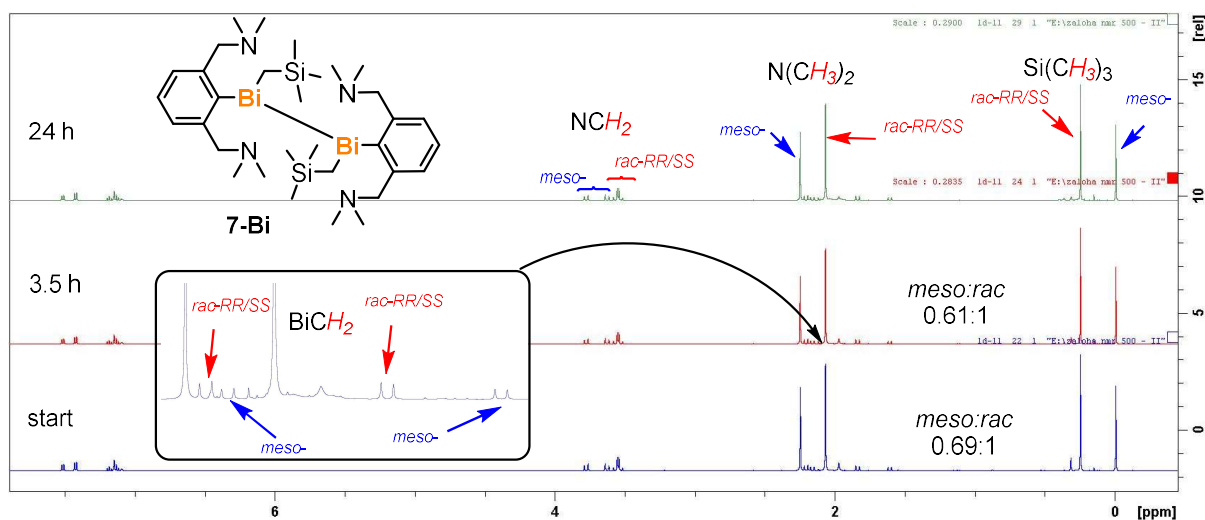

**Figure S28:**  $^1\text{H}$  NMR spectra of mixture of *meso*-**7-Bi** and *rac*-RR/SS-**7-Bi** obtained upon dissolving bulk sample (ratio 0.69:1) after crystallization and sealed in  $\text{C}_6\text{D}_6$  (bottom) and after 3.5 and 24 h (top, final ratio 0.61:1, 500 MHz).

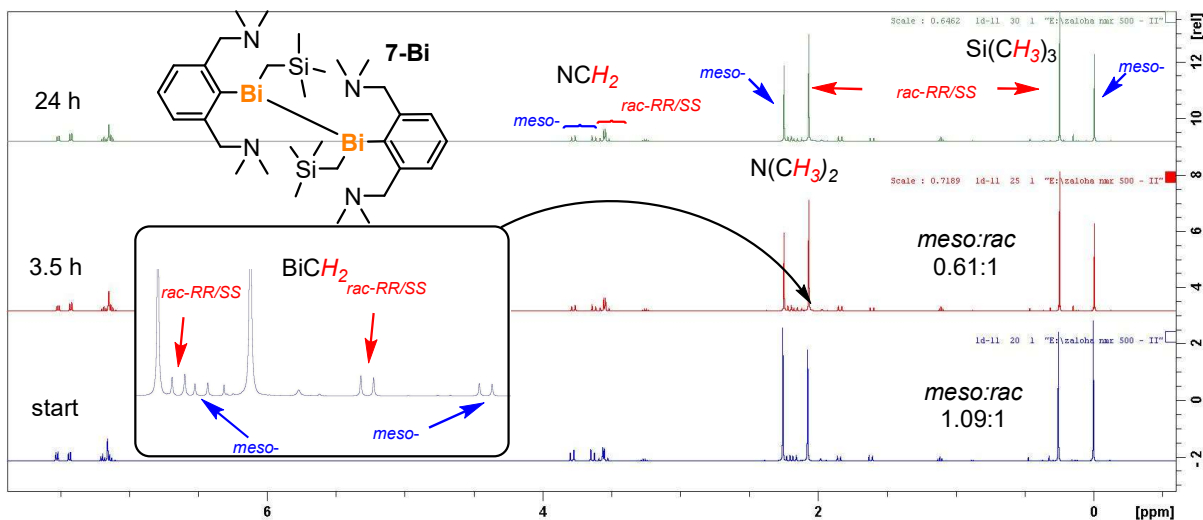

**Figure S29:**  $^1\text{H}$  NMR spectra of mixture of *meso*-7-Bi and *rac*-RR/SS-7-Bi (ratio 1.09:1) obtained upon dissolving one single crystal of *meso*-7-Bi sealed in  $\text{C}_6\text{D}_6$  (bottom) and after 3.5 and 24 h (top, final ratio 0.61:1, 500 MHz).

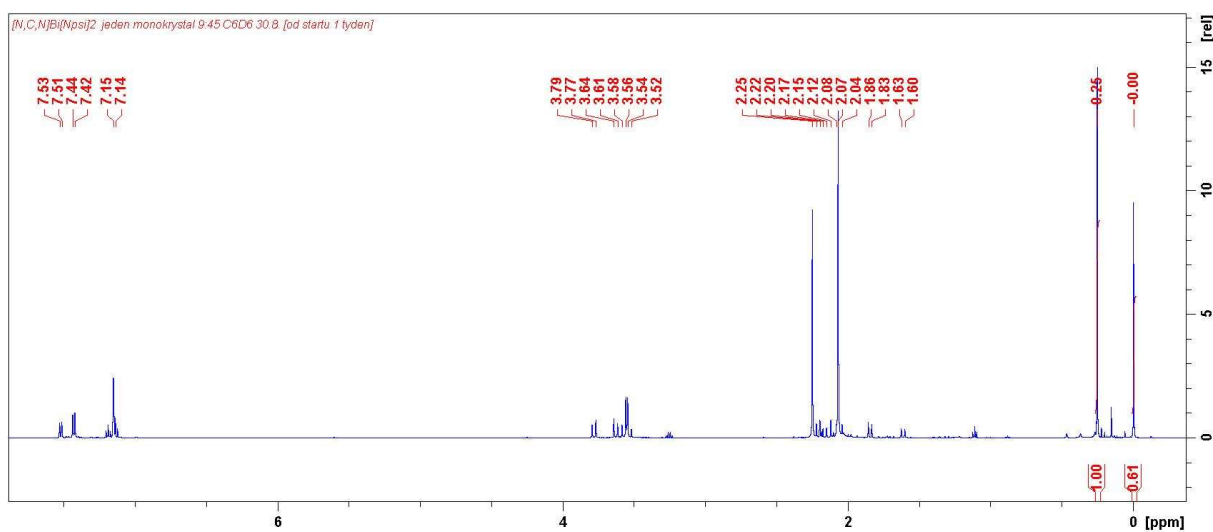

**Figure S30:**  $^1\text{H}$  NMR spectrum of mixture of *meso*-7-Bi and *rac*-RR/SS-7-Bi (ratio 0.61:1) after one week at r.t. ( $\text{C}_6\text{D}_6$ , 500 MHz).

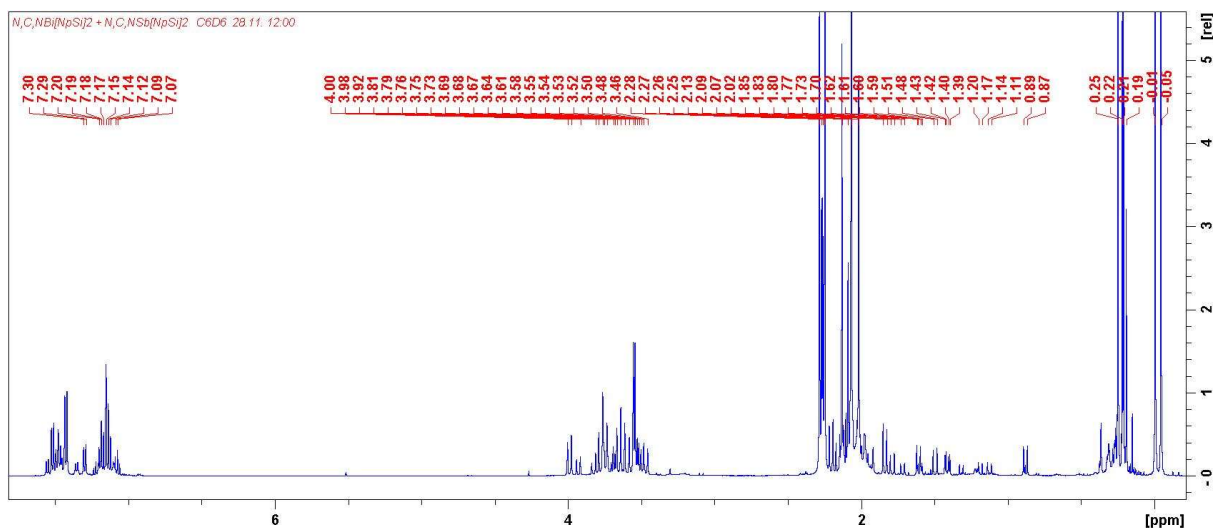

**Figure S31:**  $^1H$  NMR spectrum of mixture of *meso/rac-7-Sb* and *meso/rac-RR/SS-7-Bi* after 72 h at r.t. ( $C_6D_6$ , 500 MHz).

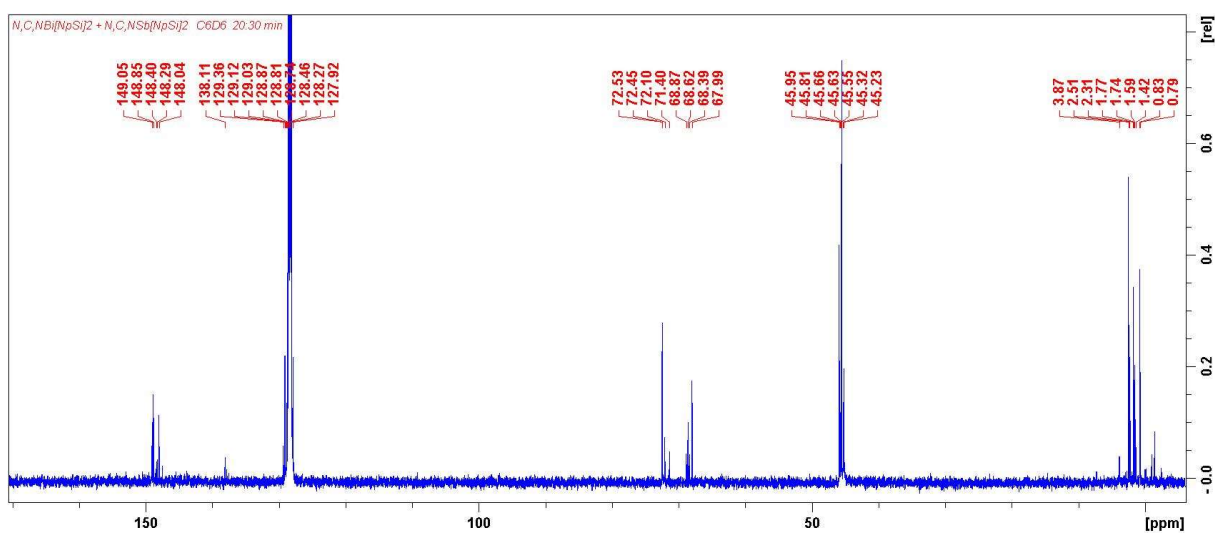

**Figure S32:**  $^{13}C\{^1H\}$  NMR spectrum of mixture of *meso/rac-7-Sb* and *meso/rac-RR/SS-7-Bi* after 72 h at r.t. ( $C_6D_6$ , 500 MHz).

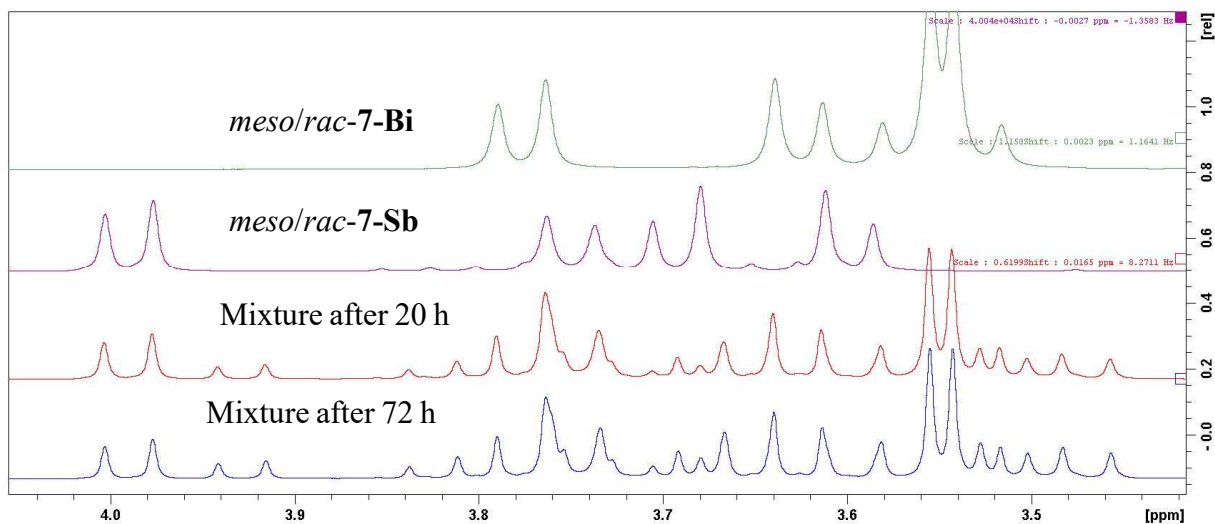

**Figure S31:**  $^1\text{H}$  NMR spectra (region of  $\text{CH}_2\text{N}$  groups) of mixture of *meso/rac-7-Sb* and *meso/rac-7-Bi* after 72 h at r.t. along with pure samples of *meso/rac-7-Sb* and *meso/rac-RR/SS-7-Bi* for comparison ( $\text{C}_6\text{D}_6$ , 500 MHz).

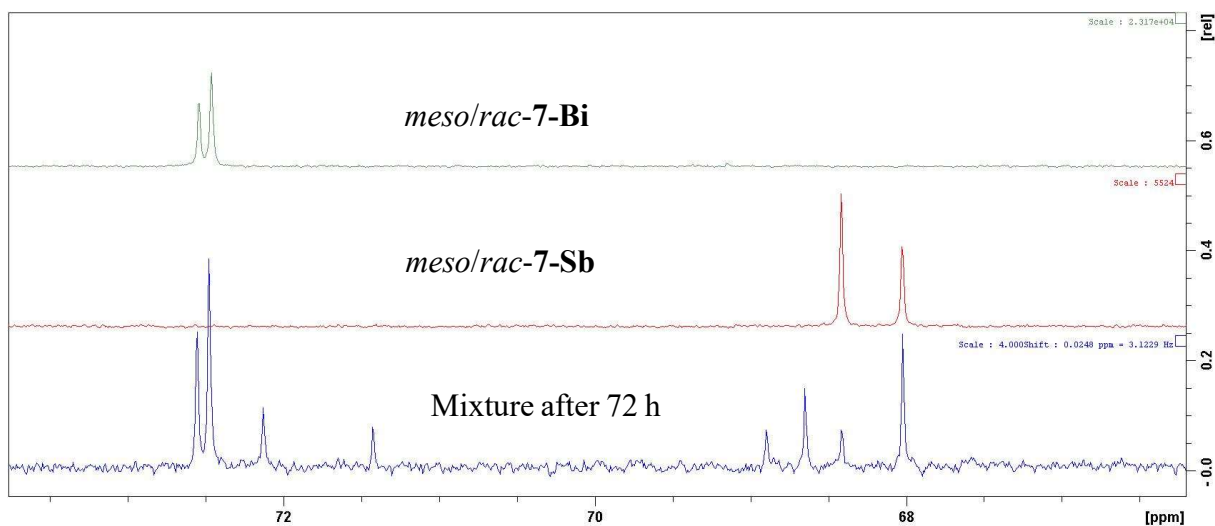

**Figure S32:**  $^{13}\text{C}\{^1\text{H}\}$  NMR spectra (region of  $\text{CH}_2\text{N}$  groups) of mixture of *meso/rac-7-Sb* and *meso/rac-7-Bi* after 72 h at r.t. along with pure samples of *meso/rac-7-Sb* and *meso/rac-RR/SS-7-Bi* for comparison ( $\text{C}_6\text{D}_6$ , 500 MHz).

#### 4) Crystallographic data for studied compounds.

**Table S1.** Crystal data and structure refinement of studied compounds.

|                                                                                     | <b>2-Bi</b>                                                                        | <b>4-Sb</b>                                                                        | <b>6-Sb</b>                                         |
|-------------------------------------------------------------------------------------|------------------------------------------------------------------------------------|------------------------------------------------------------------------------------|-----------------------------------------------------|
| Formula                                                                             | C <sub>37</sub> H <sub>50</sub> BiF <sub>3</sub> N <sub>2</sub> O <sub>3</sub> SSi | C <sub>17</sub> H <sub>30</sub> F <sub>3</sub> N <sub>2</sub> O <sub>3</sub> SSbSi | C <sub>42</sub> H <sub>65</sub> N <sub>2</sub> SbSi |
| Formula weight, g mol <sup>-1</sup>                                                 | 896.92                                                                             | 549.33                                                                             | 747.80                                              |
| Crystal system                                                                      | Monoclinic                                                                         | Triclinic                                                                          | Orthorhombic                                        |
| Crystal size, mm                                                                    | 0.59 × 0.27 × 0.15                                                                 | 0.40 × 0.07 × 0.05                                                                 | 0.59 × 0.53 × 0.37                                  |
| Space group                                                                         | P-2 <sub>1</sub> /n                                                                | P-1                                                                                | Pna2 <sub>1</sub>                                   |
| <i>a</i> , Å                                                                        | 13.8907(7)                                                                         | 9.1611(7)                                                                          | 13.5556(5)                                          |
| <i>b</i> , Å                                                                        | 13.5122(5)                                                                         | 10.0853(8)                                                                         | 18.2010(6)                                          |
| <i>c</i> , Å                                                                        | 21.3741(9)                                                                         | 13.3015(10)                                                                        | 16.9952(6)                                          |
| $\alpha$ , °                                                                        | 90                                                                                 | 87.219(3)                                                                          | 90                                                  |
| $\beta$ , °                                                                         | 92.234(2)                                                                          | 79.274(3)                                                                          | 90                                                  |
| $\gamma$ , °                                                                        | 90                                                                                 | 72.520(3)                                                                          | 90                                                  |
| <i>V</i> , Å <sup>3</sup>                                                           | 4008.7(3)                                                                          | 1151.69(16)                                                                        | 4193.1(3)                                           |
| <i>Z</i>                                                                            | 4                                                                                  | 2                                                                                  | 4                                                   |
| $\rho_{\text{calcd}}$ , Mg m <sup>-3</sup>                                          | 1.4863                                                                             | 1.584                                                                              | 1.185                                               |
| $\mu$ (Mo <i>K</i> $\alpha$ ), mm <sup>-1</sup>                                     | 4.529                                                                              | 1.384                                                                              | 0.715                                               |
| <i>F</i> (000)                                                                      | 1800                                                                               | 556                                                                                | 1584                                                |
| $\theta$ range, deg                                                                 | 1 to 26.5                                                                          | 1 to 30.0                                                                          | 1 to 29.0                                           |
| No. of reflns collected                                                             | 85620                                                                              | 42574                                                                              | 32788                                               |
| No. indep. Reflns                                                                   | 8304                                                                               | 7535                                                                               | 7888                                                |
| No. obsd reflns with ( <i>I</i> > 2 $\sigma$ ( <i>I</i> )), <i>R</i> <sub>int</sub> | 6387, 0.058                                                                        | 5697, 0.072                                                                        | 6376, 0.036                                         |
| No. refined params                                                                  | 453                                                                                | 288                                                                                | 439                                                 |
| GooF ( <i>F</i> <sup>2</sup> )                                                      | 1.053                                                                              | 1.108                                                                              | 1.027                                               |
| <i>R</i> <sub>1</sub> ( <i>F</i> ) ( <i>I</i> > 2 $\sigma$ ( <i>I</i> ))            | 0.044                                                                              | 0.053                                                                              | 0.039                                               |
| <i>wR</i> <sub>2</sub> ( <i>F</i> <sup>2</sup> ) (all data)                         | 0.063                                                                              | 0.093                                                                              | 0.085                                               |
| Largest diff peak/hole, e Å <sup>-3</sup>                                           | 1.095 / -1.446                                                                     | 2.175 / -1.325                                                                     | 0.598 / -0.369                                      |
| CCDC                                                                                | 2203728                                                                            | 2203729                                                                            | 2203732                                             |

$$R_{\text{int}} = \frac{\sum |F_o^2 - F_{o,\text{mean}}^2|}{\sum F_o^2}, S = \left[ \frac{\sum (w(F_o^2 - F_c^2)^2)}{(N_{\text{diffrs}} - N_{\text{params}})} \right]^{1/2} \text{ for all data, } R(F) = \frac{\sum ||F_o| - |F_c||}{\sum |F_o|} \text{ for observed data, } wR(F^2) = \left[ \frac{\sum (w(F_o^2 - F_c^2)^2)}{(\sum w(F_o^2)^2)} \right]^{1/2} \text{ for all data.}$$

**Table S1 (continuation).** Crystal data and structure refinement of studied compounds.

|                                                                                     | <b>6-Bi</b>                                           | <b>7-Sb</b>                                                                    | <b>7-Bi</b>                                         |
|-------------------------------------------------------------------------------------|-------------------------------------------------------|--------------------------------------------------------------------------------|-----------------------------------------------------|
| Formula                                                                             | C <sub>42</sub> H <sub>65</sub> BiN <sub>2</sub> SbSi | C <sub>32</sub> H <sub>60</sub> N <sub>4</sub> Sb <sub>2</sub> Si <sub>2</sub> | C <sub>16</sub> H <sub>30</sub> BiN <sub>2</sub> Si |
| Formula weight, g mol <sup>-1</sup>                                                 | 835.03                                                | 800.52                                                                         | 487.49                                              |
| Crystal system                                                                      | Orthorhombic                                          | Triclinic                                                                      | Triclinic                                           |
| Crystal size, mm                                                                    | 0.52 × 0.32 × 0.26                                    | 0.59 × 0.59 × 0.23                                                             | 0.59 × 0.49 × 0.09                                  |
| Space group                                                                         | P2 <sub>1</sub> 2 <sub>1</sub> 2 <sub>1</sub>         | P-1                                                                            | P-1                                                 |
| <i>a</i> , Å                                                                        | 13.4794(7)                                            | 9.6926(5)                                                                      | 9.8084(4)                                           |
| <i>b</i> , Å                                                                        | 17.0612(10)                                           | 9.9028(6)                                                                      | 9.9912(4)                                           |
| <i>c</i> , Å                                                                        | 18.2148(8)                                            | 11.5941(7)                                                                     | 11.6118(4)                                          |
| $\alpha$ , °                                                                        | 90                                                    | 114.372(2)                                                                     | 114.184(2)                                          |
| $\beta$ , °                                                                         | 90                                                    | 101.681(2)                                                                     | 100.792(2)                                          |
| $\gamma$ , °                                                                        | 90                                                    | 96.559(2)                                                                      | 98.542(2)                                           |
| <i>V</i> , Å <sup>3</sup>                                                           | 4188.9(4)                                             | 967.98(10)                                                                     | 986.96(7)                                           |
| <i>Z</i>                                                                            | 4                                                     | 1                                                                              | 2                                                   |
| $\rho_{\text{calcd}}$ , Mg m <sup>-3</sup>                                          | 1.324                                                 | 1.373                                                                          | 1.640                                               |
| $\mu$ (Mo <i>K</i> $\alpha$ ), mm <sup>-1</sup>                                     | 4.266                                                 | 1.482                                                                          | 1.482                                               |
| <i>F</i> (000)                                                                      | 1712                                                  | 410                                                                            | 474                                                 |
| $\theta$ range, deg                                                                 | 1 to 26.0                                             | 1 to 27.5                                                                      | 1 to 26.5                                           |
| No. of reflns collected                                                             | 33155                                                 | 31488                                                                          | 23235                                               |
| No. indep. Reflns                                                                   | 8201                                                  | 4432                                                                           | 4084                                                |
| No. obsd reflns with ( <i>I</i> > 2 $\sigma$ ( <i>I</i> )), <i>R</i> <sub>int</sub> | 6035, 0.058                                           | 4244, 0.034                                                                    | 3504, 0.058                                         |
| No. refined params                                                                  | 427                                                   | 189                                                                            | 198                                                 |
| Goof ( <i>F</i> <sup>2</sup> )                                                      | 1.067                                                 | 1.144                                                                          | 1.145                                               |
| <i>R</i> <sub>1</sub> ( <i>F</i> ) ( <i>I</i> > 2 $\sigma$ ( <i>I</i> ))            | 0.050                                                 | 0.022                                                                          | 0.049                                               |
| <i>wR</i> <sub>2</sub> ( <i>F</i> <sup>2</sup> ) (all data)                         | 0.114                                                 | 0.052                                                                          | 0.131                                               |
| Largest diff peak/hole, e Å <sup>-3</sup>                                           | 1.432 / -0.986                                        | 1.822 / -0.943                                                                 | 2.852 / -3.532                                      |
| CCDC                                                                                | 2203727                                               | 2203731                                                                        | 2203730                                             |

$$R_{\text{int}} = \frac{\sum |F_o^2 - F_{o,\text{mean}}^2|}{\sum F_o^2}, S = \left[ \frac{\sum (w(F_o^2 - F_c^2)^2)}{(N_{\text{diffrs}} - N_{\text{params}})} \right]^{1/2} \text{ for all data, } R(F) = \frac{\sum ||F_o| - |F_c||}{\sum |F_o|} \text{ for observed data, } wR(F^2) = \left[ \frac{\sum (w(F_o^2 - F_c^2)^2)}{(\sum w(F_o^2)^2)} \right]^{1/2} \text{ for all data.}$$

## 5) IR and Raman spectra

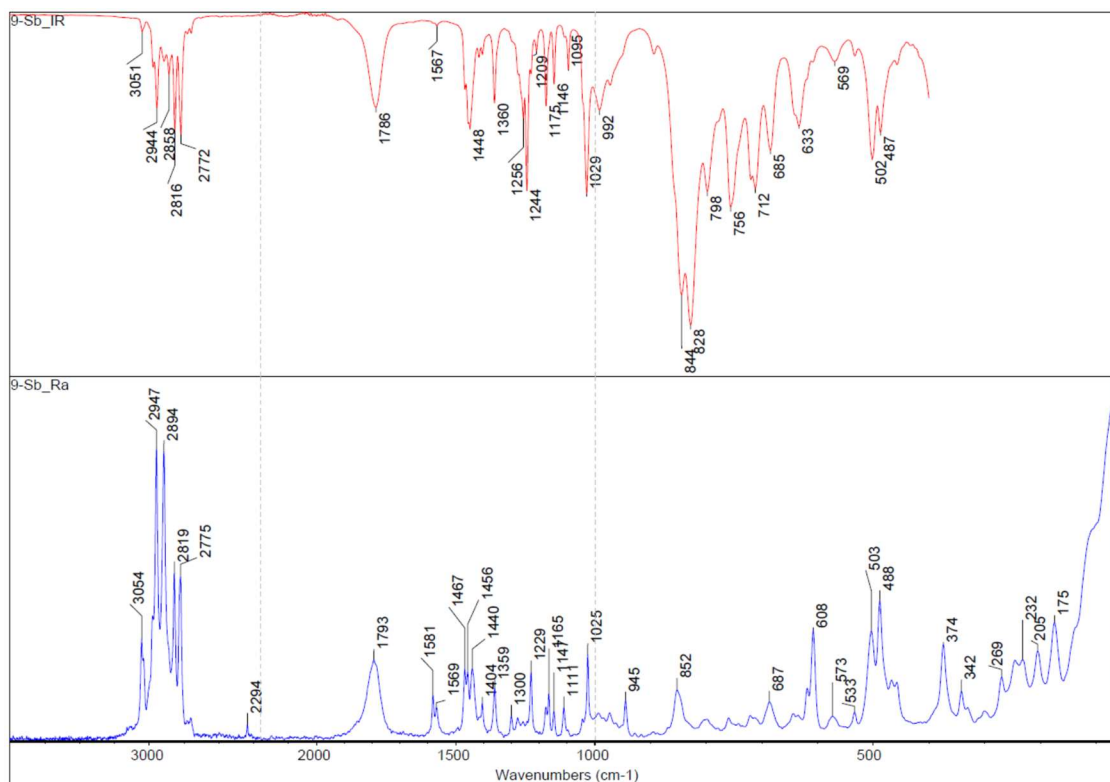

**Figure S35:** Infrared (top) and Raman (bottom) spectra of **9-Sb**.

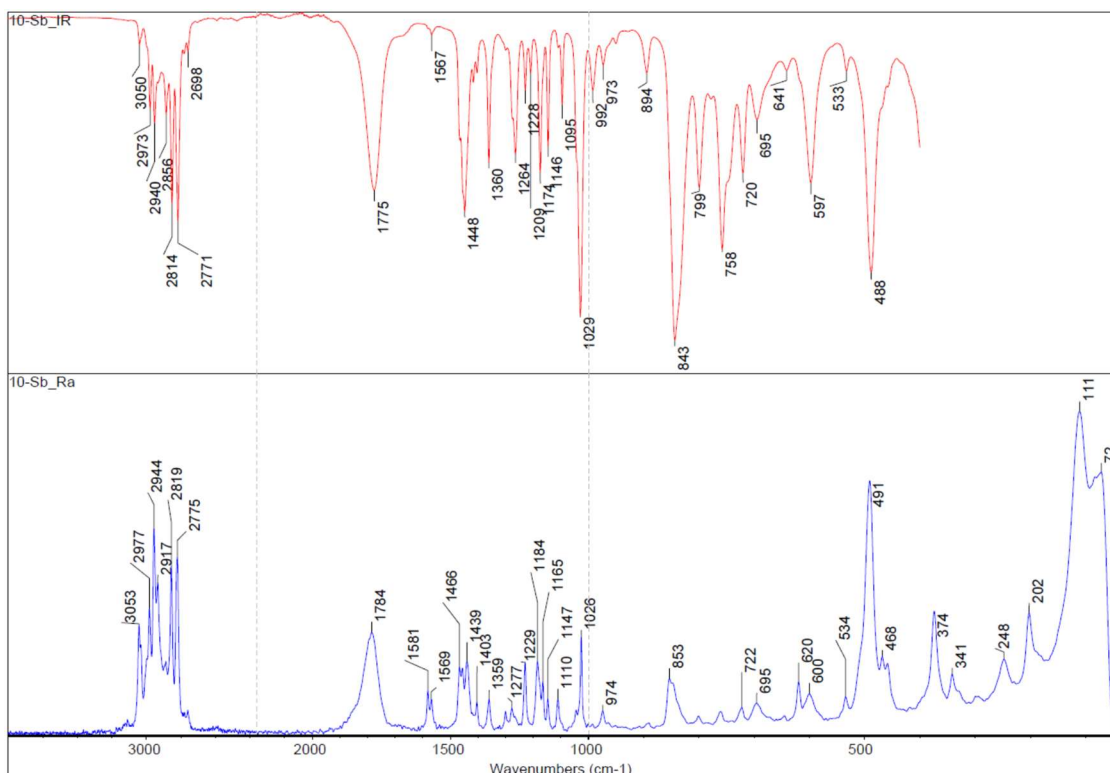

**Figure S36:** Infrared (top) and Raman (bottom) spectra of **10-Sb**.

## 6) Theoretical study

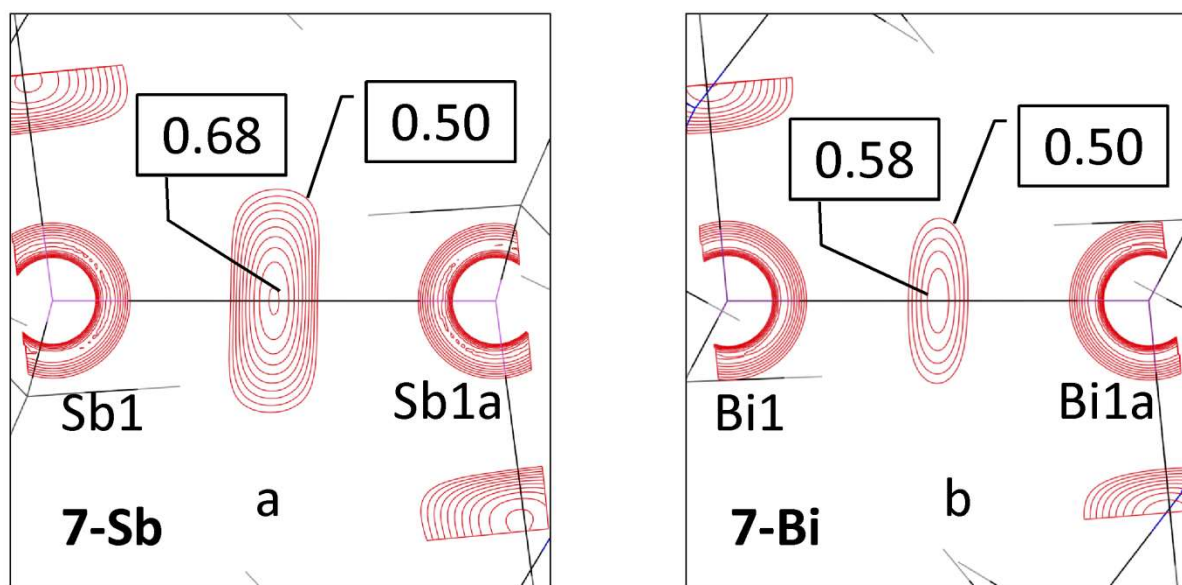

**Figure S37.** Contour maps of the LOL function (0.5-0.7, step 0.02) in the EEC(Arene) plane (E = Sb, Bi, Arene = [2,6-(Me<sub>2</sub>NCH<sub>2</sub>)<sub>2</sub>C<sub>6</sub>H<sub>3</sub>]) of complexes *meso*-7-Sb (a) and *meso*-7-Bi (b).

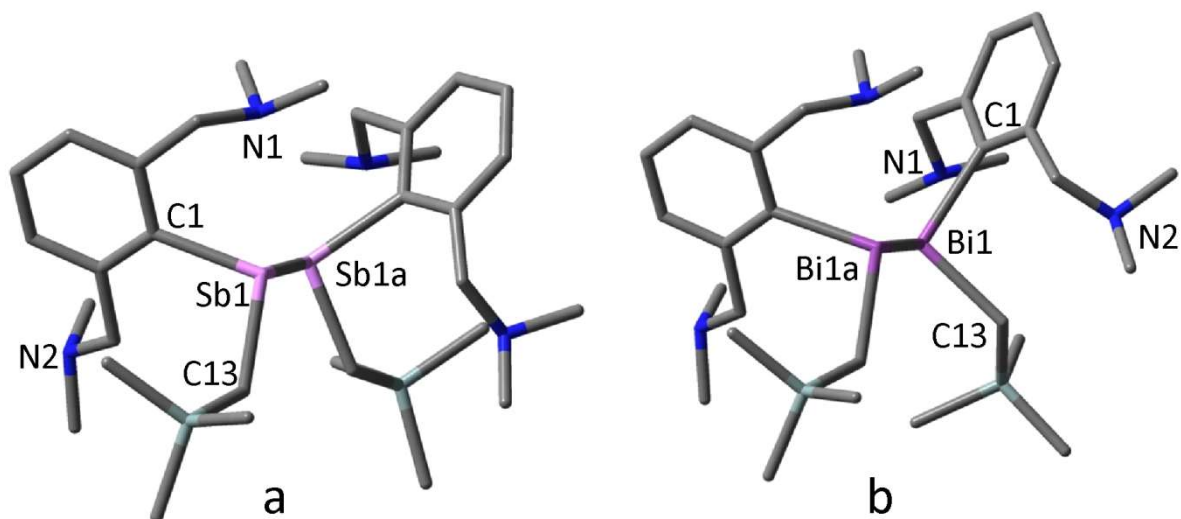

**Figure S38.** Optimized structures of *rac*-SS-7-Sb (a) and *rac*-SS-7-Bi (b). Hydrogen atoms are omitted for clarity. Selected bond lengths [Å] and angles [°]: *rac*-SS-7-Sb: Sb(1)-C(1) 2.185, Sb(1)-N(1) 3.005, Sb(1)-N(2) 4.911, Sb(1)-C(13) 2.193, Sb(1)-Sb(1a) 2.851, C(1)-Sb(1)-C(13) 102.48, C(1)-Sb(1)-Sb(1a) 92.88, C(13)-Sb(1)-Sb(1a) 99.72; *rac*-SS-7-Bi: Bi(1)-C(1) 2.287, Bi(1)-N(1) 3.184, Bi(1)-N(2) 4.221, Bi(1)-C(13) 2.274, Bi(1)-Bi(1a) 2.999, C(1)-Bi(1)-C(13) 100.56, C(1)-Bi(1)-Bi(1a) 98.84, C(13)-Bi(1)-Bi(1a) 94.41.



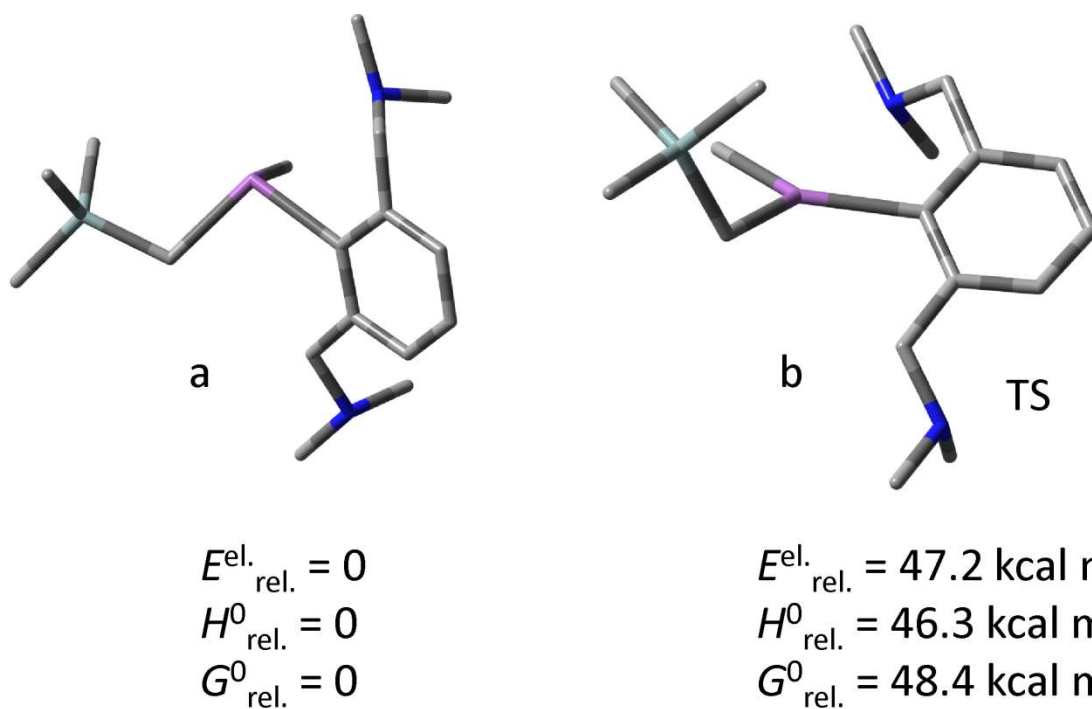

**Figure S39.** Optimized structures and relative energies of model complex [2,6-(Me<sub>2</sub>NCH<sub>2</sub>)<sub>2</sub>C<sub>6</sub>H<sub>3</sub>](NpSi)(Me)Sb and the transition state corresponding to inversion at the Sb atom.
